# 1 **Plant diversity accurately predicts insect diversity in two** 2 **tropical landscapes**

3 Zhang, K.,\*<sup>†1</sup> Lin, S.L., <sup>‡</sup><sup>1</sup> Ji, Y.Q.,\* Yang, C.X.,\* Wang, X.Y.,\*<sup>†</sup> Yang, C.Y.,\*  
4 Wang, H.,§ Jiang, H.S.,<sup>‡</sup> Harrison, R.D.<sup>¶\*\*</sup> and Yu, D.W.\*<sup>††</sup>

5 \* State Key Laboratory of Genetic Resources and Evolution, Kunming Institute of Zoology, Chinese Academy  
6 of Sciences, Kunming, Yunnan 650223, China

7 <sup>†</sup> Kunming College of Life Science, University of the Chinese Academy of Sciences, Kunming 650204, China

8 <sup>‡</sup> School of Life Sciences, South China Normal University, Guangzhou, Guangdong 510631, China

9 § Hainan Yinggeling National Nature Reserve, Baisha, Hainan 572800, China

10 <sup>¶</sup> World Agroforestry Center, East and Central Asia Regional Office, Kunming 650201, China

11 \*\* Center for Mountain Ecosystem Studies (CMES), Kunming Institute of Botany, Chinese Academy of  
12 Sciences, Kunming 650201, China

13 <sup>††</sup> School of Biological Sciences, University of East Anglia, Norwich Research Park, Norwich, Norfolk NR47TJ,  
14 UK

15  
16 Key-words: Arthropoda, biodiversity, biomonitoring, China, host specificity, insect-plant interactions,  
17 species richness, surrogate species

18 co-corresponding authors. DWY +86 871 68125438 (ofc), 86 871 65110887 (fax),

19 dougwyu@gmail.com; RDH +86 18687136498 (ofc), 86 871 65223377 (fax), r.harrison@cgiar.org

20 Send proofs to DWY.

21 Running title: Plants accurately predict insects

22 <sup>1</sup> Shared first-authorship.

23 **Abstract**

24 Plant diversity surely determines arthropod diversity, but only moderate correlations between  
25 arthropod and plant species richness had been observed until Basset *et al.* (2012, Science 338:  
26 1481-1484) finally undertook an unprecedentedly comprehensive sampling of a tropical forest  
27 and demonstrated that plant species richness could indeed accurately predict arthropod species  
28 richness. We now require a high-throughput pipeline to operationalize this result so that we  
29 can (1) test competing explanations for tropical arthropod megadiversity, (2) improve  
30 estimates of global eukaryotic species diversity, and (3) use plant and arthropod communities  
31 as efficient proxies for each other, thus improving the efficiency of conservation planning and  
32 of detecting forest degradation and recovery. We therefore applied metabarcoding to Malaise-  
33 trap samples across two tropical landscapes in China. We demonstrate that plant species  
34 richness can accurately predict arthropod (mostly insect) species richness and that plant and  
35 insect community compositions are highly correlated, even in landscapes that are large,  
36 heterogeneous, and anthropogenically modified. Finally, we review how metabarcoding  
37 makes feasible highly replicated tests of the major competing explanations for tropical  
38 megadiversity.

39 **Introduction**

40 The relationship between plant diversity and insect diversity is fundamental to ecology  
41 because (1) it underpins global species estimates of arthropods based on plant diversity  
42 (Condon *et al.* 2008; Hamilton *et al.* 2013; Stork *et al.* 2015); (2) it improves our  
43 understanding of the drivers of arthropod diversity and assembly structure (Novotny *et al.*  
44 2006; Lewinsohn & Roslin 2008; Pellissier *et al.* 2013); and (3) a strongly predictive  
45 relationship could open the way to using plant community metrics as surrogates for arthropod  
46 communities (and vice versa), thus improving the efficiency of efforts to conserve  
47 biodiversity, and ecosystem functions and services (Castagneyrol & Jactel 2012). In  
48 particular, arthropod species richness and community composition could serve as a sensitive  
49 method for detecting and quantifying the degree of forest degradation and recovery (Ji *et al.*  
50 2013; Edwards *et al.* 2014), which is especially needed for the monitoring and verification of  
51 contracts to pay local populations and governments to protect and restore standing forest, also  
52 known as PES (Payments for Environmental Services) and REDD+ schemes (Reduction in  
53 Emissions from Deforestation and Degradation) (Bustamante *et al.* 2015).

54 *A priori*, plant diversity must surely predict insect diversity (Lewinsohn & Roslin 2008;  
55 Haddad *et al.* 2009), because insects depend directly (via herbivory, pollination, and housing)  
56 and indirectly (via consumption of herbivores) on plant species, and insect herbivores show  
57 dietary specialization to subsets of plant taxa (Novotny & Basset 2005). In addition, plant and  
58 insect coevolutionary interactions have driven the vast diversity of plant and insect species  
59 today (Thompson 1994; Cruaud *et al.* 2012; Edger *et al.* 2015). (N.B. In practice, studies of  
60 terrestrial arthropod diversity tend to focus on insects because insects make up the majority of  
61 described arthropods and can be easier to sample. This study will also follow this practice.)

62 Not surprisingly, many papers have reported significant correlations between arthropod  
63 (mostly insect) and plant beta and alpha diversities (reviews in Lewinsohn & Roslin 2008;  
64 Castagneyrol & Jactel 2012; Pellissier *et al.* 2013). In particular, work by Novotny *et al.*  
65 (2002, 2006, 2007) has strongly suggested that the primary driver of high species richness  
66 among herbivorous insects in tropical forests is simply the greater number of plant species in  
67 the tropics, rather than either higher levels of host specificity and beta diversity or more insect  
68 species per area of foliage. In short, the local number of insect species should increase nearly  
69 linearly with the local number of plant species, and with a slope greater than one, since each  
70 plant species is associated with multiple herbivore and predator species (Castagneyrol &  
71 Jactel 2012).

72 However, correlations between arthropod (mostly insect) and plant species-richness have  
73 shown only moderate fit. Castagneyrol and Jactel's (2012) comprehensive meta-analysis  
74 reported mean correlations of only 0.39 and 0.51 for studies in single habitats and across  
75 multiple habitats, respectively, and a regression slope  $< 1$ , even for studies that focused on  
76 herbivores and pollinators.

77 Four possible reasons for this apparent lack of explanatory power are (1) geographic  
78 variation in the ratio of herbivores to plants and of non-herbivores to herbivores, due to  
79 coevolutionary and ecological interactions amongst plants, herbivores and their predators  
80 (Hamilton *et al.* 2013); (2) variation across plant species in their geographic ranges, which is  
81 positively correlated with total insect richness (Condon *et al.* 2008); (3) correlations and  
82 linear regressions being inappropriate models; and (4) incomplete taxon sampling (Lewinsohn  
83 & Roslin 2008). The last explanation is straightforward to test. For instance, although  
84 Pellissier *et al.* (2013) successfully demonstrated a correlation between phylogenetic beta  
85 diversities of plant and butterfly communities, they also found that plant phylogenetic alpha

86 diversity did not explain butterfly phylogenetic alpha diversity. One reason was that some of  
87 the local plant taxa were not consumed by Lepidoptera and therefore contributed to variance  
88 in plant alpha diversity but not to explanatory power. Presumably, those plant species are  
89 consumed by other insect clades, and a taxonomically more complete sample might have  
90 uncovered a positive relationship between plant and insect alpha diversity.

91 Thus, in a groundbreaking study involving 102 investigators and 129 494 arthropod  
92 specimens collected in twelve 0.04-ha quadrats of tropical forest (0.48 ha total), Basset *et al.*  
93 (2012) demonstrated that local tree species richness could predict the local species richness of  
94 both herbivore and non-herbivore arthropod taxa exceptionally well. For each of their  
95 eighteen taxon datasets (corresponding to ordinal or sub-ordinal guilds), Basset *et al.* (2012)  
96 used tree-species data from the 0.48 ha of sampling effort to extrapolate total arthropod  
97 species richness for the entire 6000-ha reserve. Overall, they found that what they called their  
98 “plant models,” which were parameterized species-accumulation curves that predicted the  
99 accumulation of arthropod species from the accumulation of tree species, were consistently  
100 able to predict “to a precision of 1%” independently derived best estimates of total arthropod  
101 species richness for the entire 6000-ha reserve.

102 In summary, Basset *et al.* (2012) showed that, given comprehensive taxon sampling and a  
103 more sophisticated statistical approach than correlations, plant species richness could indeed  
104 accurately predict arthropod species richness. However, due to their unprecedentedly huge  
105 sampling and taxonomic effort, Basset *et al.*'s (2012) protocol is effectively unrepeatable (and  
106 itself was unavoidably limited to a tiny area [0.48 ha]), but it would be highly desirable to be  
107 able to repeat this protocol efficiently in large numbers and over large spatial scales, i.e. to  
108 ‘operationalize’ the approach. At larger spatial scales (i.e. within and across landscapes),  
109 additional determinants of community structure can start to contribute, such as variation in

110 environmental conditions and variation in regional species pools (Castagneyrol & Jactel  
111 2012). It is at these larger spatial scales that plant community data would be most valuable in  
112 management for acting as a surrogate for arthropod diversity (and vice versa).

113 Metabarcoding is emerging as a promising way of advancing biodiversity research  
114 (Taberlet *et al.* 2012; Cristescu 2014). In metabarcoding, bulk samples of eukaryotes or  
115 environmental DNA are extracted, amplified, and sequenced for one or more taxonomically  
116 informative genes (DNA ‘barcodes’) (Taberlet *et al.* 2012; Yu *et al.* 2012; Ji *et al.* 2013;  
117 Cristescu 2014). Most importantly, despite false negatives (species failing to be detected) and  
118 false positives (falsely present species) being found in metabarcoding, due to primer bias (Yu  
119 *et al.* 2012; Clarke *et al.* 2014; Deagle *et al.* 2014; Piñol *et al.* 2015) and other errors in the  
120 metabarcoding pipeline (sequence errors and chimeras from PCR, library prep, and/or  
121 pyrosequencing, and species lumping and splitting in OTU clustering and taxonomic  
122 assignment), species richness and composition estimates from metabarcoded arthropod  
123 samples have been shown to correlate well with estimates calculated from standard  
124 morphological identification, even when the focal taxa are different (Yu *et al.* 2012; Ji *et al.*  
125 2013; Edwards *et al.* 2014).

126 We therefore used metabarcoding to scale up the Basset *et al.*’s (2012) approach, and we  
127 asked if plant diversity can predict insect diversity at landscape scales. Specifically, 1) does  
128 plant species richness predict insect species richness (alpha diversity); 2) does plant  
129 community composition predict insect community composition (beta diversity); and 3) is the  
130 predictive power of the plant model consistent across insect orders and over different  
131 seasons?

132 We report here that plant models parameterized with metabarcoding data produce  
133 landscape-scale estimates of total insect species richness that are very close to independent

134 non-parametric estimates of insect species richness (alpha diversity), and we also find a high  
135 degree of correlation between insect and plant community compositions (beta diversity) in  
136 two widely separated tropical landscapes. As a result, we conclude that, armed with high-  
137 throughput methods, it should indeed be possible to operationalize Basset *et al.*'s (2012)  
138 important result that plant diversity can accurately predict arthropod diversity.

139 One potential benefit is that modern remote-sensing technologies, which show increasing  
140 promise at efficient assessment of plant community composition (Asner *et al.* 2014; Baldeck  
141 *et al.* 2015), might now also make possible the efficient management of a large proportion of  
142 animal biodiversity. Another benefit, and perhaps the most important one, is that it should  
143 now be possible to conduct highly replicated tests of the major competing explanations for  
144 tropical megadiversity (Lewinsohn & Roslin 2008), and we explain this in detail in the  
145 Discussion.

## 146 **Materials and Methods**

### 147 *Study sites*

148 We conducted our study in two montane landscapes in tropical southern China (Fig. 1), which  
149 differ in the nature of environmental heterogeneity they encompass and provide contrasting  
150 case studies of the relationship between plant and insect diversity at landscape scales.

151 Yinggeling Nature Reserve is located in central Hainan province (UTM/WGS84: 49N  
152 328731 E, 2102468 N), a land-bridge island, and is the largest nature reserve in Hainan with  
153 an area of > 500 km<sup>2</sup>. The elevation ranges from 180 m to 1812 m, and the annual mean  
154 temperature correspondingly ranges between 24°C to 20°C. Mean annual rainfall is 1800–  
155 2700 mm. The principal vegetation types are tropical montane rainforest and tropical montane

156 evergreen broadleaf forest (Lin *et al.* 2013). Over 64% of the vegetation in the reserve is in a  
157 near-pristine state, although many of the carnivores have been extirpated (Lau *et al.* 2010).

158 Mengsong (UTM/WGS84: 47N 656355 E, 2377646 N) is a sub-catchment of the upper  
159 Mekong River, with an area of ~100 km<sup>2</sup>. The elevation ranges from 800 m to 2000 m.  
160 Mengsong has a subtropical climate influenced by the Indian monsoon. The annual mean  
161 temperature is 18°C (at 1600 m asl). Mean annual rainfall varies between 1600–1800 mm, 80%  
162 of which falls in May–October. Mengsong has a > 200-year of occupation by indigenous  
163 farmers, who formerly practiced swidden agriculture (Xu *et al.* 2009). Hence, today the  
164 landscape is a mosaic of mature forest with a history of selective cutting, forest that has  
165 naturally regenerated from clearance, and currently open land, such as terrace tea fields and  
166 grasslands. The principal primary vegetation types are seasonal montane rain forest in valleys,  
167 which grades into tropical montane evergreen broadleaf forest on upper slopes and ridges  
168 (Zhu *et al.* 2005). Part of Mengsong was included in Bulong Nature Reserve established in  
169 2009. As with Yinggeling, many of the larger vertebrates have been extirpated (Sreekar *et al.*  
170 2015).

#### 171 *Biodiversity sampling*

172 *Yinggeling*. - Twenty-nine 50×50 m plots were set up in Yinggeling in May 2009 (10 plots)  
173 and September 2011 (19 plots) (Fig. 1). The plot locations were selected from a satellite  
174 image to incorporate as much of the substantial topographic variation found within the nature  
175 reserve as logistically possible. However, plot locations were not strictly randomly chosen.  
176 Plots established in 2009 were clustered, so for our study, only one plot was selected  
177 randomly from each cluster to minimize pseudo-replication. In total, 21 plots in Yinggeling  
178 were included. All trees ≥ 5 cm DBH ('diameter at breast height,' which is set at 1.3 m from



179 the soil surface) in each plot were surveyed. Species name, DBH, height and crown width  
180 were recorded. Field identifications were conducted by local experts.

181 Insects were sampled in the wet season (September to November 2011) using a Malaise  
182 trap located at the center of each plot for an average of 16 days (range: 12-25) depending on  
183 the weather, which affects capture efficiency. The collecting bottles on the Malaise traps were  
184 filled with 99.9% ethanol. Upon collection, the contents of each bottle were sieved to remove  
185 ethanol and placed in a storage bottle with fresh 99.9% ethanol. Between samples, the sieve  
186 and other equipment were rinsed with water and ethanol-flamed to prevent DNA cross-  
187 contamination.

188 *Mengsong.* - Twenty-eight 100×100 m plots were set up from April 2010 to May 2011,  
189 based on a stratified random sampling design described in Paudel *et al.* (2015) (Fig. 1). Plots  
190 covered a gradient from heavily disturbed shrubland and grassland ( $n = 6$ ), through  
191 regenerating forest ( $n = 12$ ) to mature forest ( $n = 10$ ). Each plot consisted of nine 10-m radius  
192 subplots arranged on a square grid with 50 m spacing (Beckschäfer *et al.* 2014). All trees,  
193 bamboos, and lianas with  $\geq 10$  cm DBH were recorded within a 10-m radius of the subplot  
194 center, and all trees, bamboos, and lianas with 2-10 cm DBH were recorded within a 5-m  
195 radius of the subplot center. Species name, DBH, distance and angle to the subplot center  
196 were recorded. All herbs, ferns, and woody seedlings with  $< 2$  cm DBH were surveyed within  
197 1-m radius of the subplot center using a Braun-Blanquet coverage estimator (total coverage  
198 for each species was estimated visually and recorded using cover-abundance scale within six  
199 cover classes). Vouchers of every species in each plot were collected, and field identifications  
200 were confirmed (or adjusted) based on comparison to herbarium material at the  
201 Xishuangbanna Tropical Botanical Garden (HITBC). The vouchers were later deposited at the  
202 Kunming Institute of Botany.

203 Insects were collected with Malaise traps in five subplots (four corners and the middle  
204 subplot) over six days at the end of the wet season (November-December 2010, hereafter wet  
205 season) and at the end of the dry season (May-June 2011, hereafter dry season). The  
206 collection and laboratory processing protocol were same as for Yinggeling. Subplot samples  
207 were pooled within each plot for further analyses.

208 *DNA extraction, PCR amplification, pyrosequencing, and bioinformatic analysis*

209 Samples were prepared by using one leg from all specimens equal to or larger than a large fly  
210 (~5 mm length) and whole bodies of everything smaller, added with 4 ml Qiagen ATL buffer  
211 (Hilden, Germany) (20 mg/ml proteinase  $k = 9 : 1$ ) per 1 g of sample, homogenized with  
212 sterile 0.25-inch ceramic spheres in a FastPrep-24<sup>®</sup> system (MP Biomedicals, Santa Ana, CA,  
213 USA) set on 5 m/s for 1 min at room temperature, and incubated overnight at 56 °C. The  
214 genomic DNA was extracted with the Qiagen DNeasy Blood & Tissue Kit, with  $\leq 900 \mu\text{L}$  per  
215 spin column, and quality-checked using the Nanodrop 2000 spectrophotometer (Thermo  
216 Fisher Scientific, Wilmington, DE, USA). DNA was PCR amplified for the standard mtCOI  
217 barcode region using the degenerate primers, *Fol-degen-for* 5'-  
218 TCNACNAAYCAYAARRAYATYGG-3' and *Fol-degen-rev* 5'-  
219 TANACYTCNGGRTGNCCRAARAAYCA-3' (Yu *et al.* 2012). The standard Roche A-  
220 adaptor and a unique 10 bp MID (Multiplex IDentifier) tag for each sample were attached to  
221 the forward primer. PCRs were performed in 20  $\mu\text{L}$  reaction volumes containing 2  $\mu\text{L}$  of 10  $\times$   
222 buffer, 1.5 mM  $\text{MgCl}_2$ , 0.2 mM dNTPs, 0.4  $\mu\text{M}$  each primer, 0.6 U HotStart Taq DNA  
223 polymerase (TaKaRa Biosystems, Ohtsu, Japan), and ~60 ng of genomic DNA. We used a  
224 touchdown thermocycling profile of 95 °C for 2 min; 11 cycles of 95 °C for 15 s; 51 °C for 30  
225 s; 72 °C for 3 min, decreasing the annealing temperature by 1 degree every cycle; then 17  
226 cycles of 95 °C for 15 s, 41 °C for 30 s, 72 °C for 3 min and a final extension of 72 °C for 10

227 min. We used non-proofreading Taq and fewer, longer cycles to reduce chimera production  
228 (Lenz & Becker 2008; Yu *et al.* 2012). DNA from each sample was amplified in three  
229 independent reactions and pooled to reduce amplification stochasticity. A negative control  
230 was included for each sample during PCR runs to detect contamination. For pyrosequencing,  
231 PCR products were gel-purified by using a Qiagen QIAquick PCR purification kit, quantified  
232 using the Quant-iT PicoGreen dsDNA Assay kit (Invitrogen, Grand Island, New York, USA),  
233 pooled and A-amplicon-sequenced on a Roche GS FLX at the Kunming Institute of Zoology.  
234 The 21 Yinggeling samples were sequenced on two 1/8 regions (one 1/8 region shared with  
235 other samples). The 28 Mengsong samples were sequenced on one whole run (four 1/4  
236 regions, November-December 2010: wet season) and two 1/4 regions (May-June 2011: dry  
237 season), respectively.

238 We followed an experimentally validated bioinformatic pipeline (Yu *et al.* 2012; Ji *et al.*  
239 2013) to denoise, deconvolute, and cluster the reads into 97%-similarity Operational  
240 Taxonomic Units (OTUs). *Quality control*: Header sequences and low-quality reads were  
241 removed from the raw output in the QIIME 1.5.0 environment (split\_libraries.py: -l 100 -L  
242 700 -H 9 -M 2 -b 10) (Caporaso *et al.* 2010b). We removed any sequences < 100 bp.  
243 *Denoising, deconvoluting and chimera removal*: PyNAST 1.1 (Caporaso *et al.* 2010a) was  
244 used to align reads against a high-quality, aligned data set of Arthropoda sequences (Yu *et al.*  
245 2012), and sequences that failed to align at  $\geq 60\%$  similarity were removed. The remaining  
246 sequences were clustered at 99% similarity with USEARCH 5.2.236 (Edgar 2010), a  
247 consensus sequence was chosen for each cluster, and the UCHIME function was used to  
248 perform *de novo* chimera detection and removal. A clustering step is required for chimera  
249 detection because chimeric reads are expected to be rare and thus belong to small clusters  
250 only. The final denoising step used MACSE 0.8b2 (Ranwez *et al.* 2011), which aligns at the

251 amino acid level to high-quality reference sequences and uses any stop codons in COI to infer  
252 frameshift mutations caused by homopolymers. *OTU-picking and Taxonomic assignment:*  
253 Sequences were chain-clustered at 97% similarity using CROP 1.33 (Hao *et al.* 2011). Each  
254 cluster of sequences represents a set of COI reads that are more similar to each other than to  
255 any other cluster, and is called an operational taxonomic unit (OTU), which should  
256 approximate or somewhat underestimate biological species. OTUs were assigned taxonomies  
257 using SAP 1.0.12 (Munch *et al.* 2008), keeping only taxonomic levels for which the posterior  
258 probability was  $\geq 80\%$ . OTUs containing only one read (which tend to be PCR or sequencing  
259 errors and are uncertain presences [Ficetola *et al.* 2015]) or assigned to non-Arthropoda taxa  
260 were discarded.

#### 261 *Statistical analysis*

262 Analyses were mostly performed using R 3.2.2 (R Core Team 2015) and packages *BAT* 1.3.1  
263 (Cardoso *et al.* 2015) and *vegan* 2.3-0 (Oksanen *et al.* 2015). We converted metabarcoding  
264 read numbers to presence/absence data before analyses, because read numbers are unlikely to  
265 reflect biomass or abundance (Yu *et al.* 2012). We first analyzed all Insecta-assigned OTUs  
266 together and then separately analyzed each Insecta order with  $\geq 50$  OTUs, including  
267 Coleoptera, Diptera, Hemiptera, Hymenoptera, Lepidoptera, and Psocoptera (the last for  
268 Mengsong only). More than 90% of OTUs were identified to order rank. We did not conduct  
269 analysis at family level, since less than half of the OTUs were identified to this rank. We  
270 tentatively included Arachnida from Mengsong ( $n = 84$  and  $83$  OTUs for wet and dry season,  
271 respectively) in our analyses of species richness, although they are a by-catch of Malaise traps  
272 and hence may have a more stochastic pattern.

273 *Species richness*

274 To test whether plant species richness can predict insect species richness estimated from  
275 metabarcoded Malaise-trap samples (i.e. Insecta OTU richness), we first calculated Pearson's  
276 correlations (*cor.test* function) to allow comparison with the wider literature (Castagneyrol &  
277 Jactel 2012). We then applied the “plant model” approach of Basset *et al.* (2012), as follows:

278 First, the mean number of arthropod OTUs and of plant species found with each additional  
279 vegetation sampling plot (i.e. rarefaction curves) (*specaccum* in *vegan*) were calculated. To  
280 control for the order in which plots are added, we randomly subsampled the data without  
281 replacement (method = “random”, permutations = 9999).

282 Second, we used CurveExpert 1.4 (Hyams 2009; default settings, except maximum  
283 iterations = 1000) to fit functions to the relationship between the mean number of arthropod  
284 OTUs and the mean number of plant species found with each additional sampling plot.  
285 Following Basset *et al.* (2012), we used AICc to choose the best function from three  
286 candidates: linear, power and Weibull functions, and called the best function the “plant  
287 model.” For comparison, we also chose the best function from a broader selection of 25  
288 candidates, including ones used in other studies (Dengler 2009). These alternative candidates  
289 included linear (including quadratic fit and 3<sup>rd</sup> degree polynomial fit), exponential, power,  
290 growth, sigmoidal and rational functions (Hyams 2009). We selected the top three functions  
291 based on AICc. Since statistical models offering a good fit to the data do not necessarily result  
292 in a robust species richness estimates (Basset *et al.* 2012), we again fitted the top three  
293 functions to a random subset of data (20 out of 28 plots for Mengsong, 15 out of 21 plots for  
294 Yinggeling) to check for robustness. Then we predicted the arthropod OTU richness at 297  
295 tree species (the number of species in all the Yinggeling survey plots) or at 807 vascular plant  
296 species (the number of species in all the Mengsong survey plots) with these newly

297 parameterized models, and we compared these predicted richnesses against the observed  
298 arthropod OTU richnesses in our metabarcode datasets. The best function was the one with  
299 the smallest absolute difference (similar to the “lowest error of extrapolation” in Dengler  
300 2009). The results from three and 25 candidate functions proved similar, and we thus focused  
301 on the results from the first approach, using three candidate functions.

302 Third, we extrapolated the best function (i.e. the “plant model”) to the total plant species  
303 richness in the landscape to generate the plant model’s prediction of total arthropod species  
304 richness. In Yinggeling, there are 603 tree species known from the total reserve (Lin *et al.*  
305 2013). In Mengsong, no information on total vascular plant species richness is available, so  
306 we used non-parametric estimators to extrapolate from the plot data to total vascular plant  
307 species richness (*alpha.accum* in *BAT*).

308 Fourth, we used non-parametric estimators to independently estimate total arthropod OTU  
309 richness in the landscape directly from the arthropod dataset (*alpha.accum* in *BAT*), and we  
310 compared this extrapolation with the prediction from the plant model (‘same-site prediction’).  
311 Specifically, we calculated the explained variance ( $R^2$ ) when fit to a  $y = x$  model, and also  
312 calculated correlations (*cor.test*, method = “pearson”) for insect orders.

313 Note that there exists no ‘true’ biodiversity dataset to test against. Basset *et al.* (2012) used  
314 both statistical (best-fitting function with lowest error of extrapolation) and biological  
315 arguments (relevant surveys in the world with large sampling efforts) to get their best  
316 estimates of arthropod diversity. As no comparable surveys with metabarcoding techniques  
317 are available, we necessarily used non-parametric estimators, choosing those (Jackknife1,  
318 Jackknife2 and Chao) that have been shown to perform better than other estimators (Walther  
319 & Moore 2005; Hortal *et al.* 2006). Non-parametric estimators use the species  
320 abundance/occurrence relationships (e.g. the number of species occurring in only one or two

321 sites throughout the samples) to estimate the total number of species (Hortal *et al.* 2006). We  
322 further applied a correction factor ( $P$ ) for these non-parametric estimators to improve  
323 performance under conditions of low sampling effort, which is usually the case in arthropod  
324 surveys (Lopez *et al.* 2012). In Mengsong, the above approach was firstly applied to the  
325 whole landscape, and then separately to forests (mature and regenerating forest) and open  
326 lands. We also included only tree data to build the plant model in the Mengsong forests.

327 Finally, to evaluate the generality of our plant models, we used Yinggeling's plant model to  
328 try to predict Mengsong insect diversity, and used Mengsong's plant model to try to predict  
329 Yinggeling insect diversity ('cross-site prediction'). Yinggeling and Mengsong are good  
330 candidates for such a test, as they are in the same zoogeographic region (Holt 2013) but are  
331 far from each other (~1000 km). However, Yinggeling and Mengsong have different  
332 landscape histories, and their vegetation had been sampled differently. To maximize  
333 comparability, we used only the Mengsong plots ( $n = 16$ ) located within the forest of Bulong  
334 Nature Reserve (~60 km<sup>2</sup>) (Fig. 1) and only included trees  $\geq 5$  cm DBH in each plot.

### 335 *Community composition*

336 To test whether plant species compositions can predict insect species compositions, we could  
337 use Mantel tests, Procrustes analysis, or co-correspondence analysis, with each approach  
338 offering advantages and drawbacks (reviewed in Gioria *et al.* 2011). We elected to use  
339 Procrustes analysis, because it is generally more powerful than Mantel tests and is more  
340 widely used than co-correspondence analysis, facilitating comparison with other studies.  
341 Procrustes analysis superimposes one ordination on top of another by minimizing the sum of  
342 the squared distances between points from the first to the second ordination. The probability  
343 of the fit is calculated by comparing the observed sum of squared distances against those from  
344 a null distribution obtained by repeated Procrustes fitting of permuted data (Oksanen *et al.*

345 2015). We used a non-metric multidimensional scaling (NMDS) ordination (*metaMDS* in  
346 *vegan*, distance = “jaccard”) of community composition data as the input data matrices for the  
347 Procrustes analyses (*protest* in *vegan*, symmetric = TRUE). Because the Procrustes analysis  
348 requires an identical number of axes in both ordinations, we constrained the number of axes to  
349 two ( $k = 2$ ) for Yinggeling and four ( $k = 4$ ) for Mengsong across all analyses. Initial  
350 exploratory analyses found that two/four axes were optimal for most groups (low stress and  
351 consistent results). Stress values ranged from 0.08 – 0.24. We also used these approaches to  
352 compare variation in community compositions among insect orders and between the two  
353 seasons in Mengsong.

## 354 **Results**

### 355 *Species richness*

356 The 21 Yinggeling samples produced 40 261 sequence reads, and the 28 Mengsong samples  
357 produced 519 865 and 253 025 reads for wet season and dry season, respectively. After  
358 bioinformatic processing, we obtained 1 995 Insecta OTUs from Yinggeling, and we obtained  
359 2 946 Insecta OTUs from Mengsong, including 2 073 in the wet season and 2 215 in the dry  
360 season samples. None of the PCR negative controls detected sample contamination.

361 All the ‘plant models’ exhibited very close fits to the non-parametric estimates of total  
362 OTU richness for insects as a whole (Insecta) and for individual orders (Coleoptera, Diptera,  
363 Hemiptera, Hymenoptera, Lepidoptera and Psocoptera) in both Yinggeling (Figs. 2 and S1, all  
364 Pearson’s  $r > 0.98$ ) and Mengsong (Figs. 2 and S1, all Pearson’s  $r > 0.99$ ). Similar results  
365 were obtained when we analyzed forests and open land separately in Mengsong (Figs. S2 and  
366 S3), and similar results were obtained when we used only trees to build the plant models in  
367 Mengsong forests (Fig. S4). In contrast, and consistent with the results compiled by



368 Castagneyrol & Jactel (2012), simple Pearson correlations between insect OTU richness and  
369 plant species richness at the survey plot level were low (Yinggeling: all  $r \leq 0.14$ ; Mengsong:  
370 all  $r \leq 0.29$  for both wet and dry seasons).

371 The cross-site plant-model predictions (Yinggeling plant model predicting Mengsong  
372 Insecta OTU richness and vice versa) lay within an error of 2X for all Insecta and for three  
373 orders (Coleoptera, Hemiptera, Hymenoptera), but not for Diptera and Lepidoptera (Fig. 3).  
374 Given the observed scatter, all correlations were, not surprisingly, very low (Mengsong's wet-  
375 season plant model predicting Yinggeling: all Pearson's  $r < 0.1$ ; Yinggeling's plant model  
376 predicting Mengsong's wet season: all Pearson's  $r \leq 0.1$ . Similar results were obtained when  
377 we used Mengsong's dry-season data, Fig. S5. In all analyses, we excluded the Insecta points  
378 to avoid double counting.)

#### 379 *Community composition*

380 Community compositions in Insecta and plants were highly correlated in both Yinggeling and  
381 Mengsong (Fig. 4, Table 1). Correlations were reduced somewhat but were still high when we  
382 considered insect orders separately, likely reflecting the smaller sample size at this taxonomic  
383 level (Figs. S6 and S7, Table 1). High correlations were maintained even when we limited our  
384 analyses to only forests in Mengsong (Table S1).

385 In Mengsong, 61% of Insecta OTUs recorded in the wet season were also recorded in the  
386 dry season. Interestingly, community compositions remained highly correlated between these  
387 two seasons for all Insecta and for individual insect orders, except Lepidoptera and  
388 Psocoptera (Table 1), showing that despite turnover across seasons, the different insect  
389 species compositions contain the same 'ecological information,' meaning that they  
390 consistently reveal the persistent compositional differences between the different vegetation  
391 plots, which themselves reflect differences in microhabitats, food sources and histories.

392 Finally, community compositions were highly correlated between most pairs of insect  
393 orders in both Yinggeling and Mengsong, with the exceptions of Lepidoptera and Hemiptera  
394 in Yinggeling and Lepidoptera and Psocoptera in the wet season of Mengsong (Table 1). This  
395 suggests that different insect orders also contain similar ecological information about habitat  
396 differences. Again, these results were upheld even when analyzing only forests in Mengsong  
397 (Table S1).

## 398 **Discussion**

399 Our study has demonstrated (1) a close fit between estimates of total insect species richness  
400 that have been derived from plant models and from non-parametric estimators (Figs. 2 and  
401 S1), and (2) a high degree of correlation between insect communities and plant communities  
402 (Fig. 4). Moreover, we replicated our results in two landscapes (Yinggeling and Mengsong),  
403 in two seasons in one of these landscapes (wet and dry in Mengsong), and across multiple  
404 insect orders (Figs. S6 and S7).

405 Furthermore, we have extended the plant-model approach from tropical America to  
406 tropical Asia, from a homogeneous forest of 60 km<sup>2</sup> to two heterogeneous, anthropogenically  
407 modified landscapes (~100-500 km<sup>2</sup>), and from a labor-intensive dataset of morphologically  
408 identified specimens to an efficiently processed dataset of metabarcoded samples. We even  
409 found that plant models from one landscape could predict the species richnesses of Coleoptera,  
410 Hemiptera, Hymenoptera, and all Insecta in another landscape to within an error of 2X (cross-  
411 site predictions, Figs. 3 and S5). However, cross-site predictions were quantitatively  
412 inaccurate, suggesting that a general plant model (at least for our sampling protocol) does not  
413 exist.

414 Our results thus strongly support Basset *et al.*'s (2012) finding that plant species richness  
415 can be an accurate predictor of insect species richness in tropical forest, and we show that

416 plant and insect species compositions are highly correlated. Also, given that the Mengsong  
417 plant model was able to predict Arachnida species richness (Figs. 2 and S2), we find some  
418 support for the broader conclusion that plant diversity can be an accurate predictor of  
419 arthropod diversity. Of course, it will be necessary to carry out taxonomically more  
420 comprehensive sampling to be able to support the last conclusion strongly.

#### 421 *Malaise traps and metabarcoding*

422 When resources are limited, which they always are, a feasible way to carry out arthropod  
423 diversity surveys at large scales is to combine mass trapping (here, Malaise traps) with a high-  
424 throughput taxonomic method (here, metabarcoding). Naturally, this places limitations on the  
425 informational content of the resulting datasets. Any given trap type can collect only a portion  
426 of total arthropod biodiversity, and the downstream processes of DNA extraction, PCR  
427 amplification, high-throughput sequencing, and bioinformatic processing will result in false  
428 negatives (‘dropout species’) and false positives (‘artefactual species’ created by PCR-  
429 induced sequence chimeras, and PCR, sequencing, and clustering errors) (Bohmann *et al.*  
430 2014).

431 PCR primers and software pipelines have been developed to minimize these errors (here,  
432 Yu *et al.* 2012), but more important is to understand how to interpret metabarcoding outputs  
433 judiciously. Multiple studies (Yu *et al.* 2012; Ji *et al.* 2013; Yang *et al.* 2014) have shown  
434 using both mock and real biodiversity samples that, despite false negatives and positives,  
435 metabarcoding datasets are nonetheless reliable for estimating *community-level* metrics of  
436 alpha and beta diversity. In other words, the degree to which arthropod samples (and thus  
437 locations) differ in species richness and composition can be quantified with metabarcoding,  
438 which is precisely the requirement of our study. We were thus able to recapitulate Basset *et al.*  
439 (2012) in finding that Weibull-function plant models accurately predict insect communities.

440       However, we cannot directly compare the parameter values of our plant models with  
441       Basset *et al.*'s (2012) models for two reasons. Most importantly, we used only Malaise traps,  
442       which are designed to capture flying insects that escape upwards (many beetles drop when  
443       they hit a barrier and are thus not captured, and nonflying species are missed), whereas Basset  
444       *et al.*'s (2012) collections were more comprehensive. Less importantly, our species concept is  
445       based on COI sequence similarity, which will differ somewhat (but not hugely) from  
446       morphological concepts in the Arthropoda (e.g. Schmidt *et al.* 2015). In any event, the use of  
447       DNA barcodes as a major input to species delimitation is now mainstream (Ratnasingham &  
448       Hebert 2013; Riedel *et al.* 2013; Tang *et al.* 2014), and barcodes are advantageous because  
449       they more efficiently reveal cryptic species (Condon *et al.* 2008).

450       *Explaining tropical herbivore megadiversity*

451       Lewinsohn and Roslin (2008) partitioned the causes of tropical herbivore megadiversity into  
452       four components: (A) more host plant species in the tropics combined with some level of host  
453       specificity, (B) more arthropod species per tropical plant species, (C) higher host specificity  
454       of tropical herbivores, and (D) higher rates of species turnover (beta diversity) within the  
455       same host species in the tropics. Studies by Novotny *et al.* (2002, 2006, 2007) in Papua New  
456       Guinea, with temperate-zone contrasts in Central Europe, have supported component A (more  
457       host plant species) over the other three components, whereas a compilation of feeding  
458       experiments by Dyer *et al.* (2007) has supported component C: higher host specificity in  
459       tropical species. Two important observations made by Dyer *et al.* (2007) are that broad host  
460       range in temperate-zone is more obvious when more hostplant species are surveyed, and that  
461       different hostplant species in the tropics show higher levels of insect community  
462       differentiation than do different temperate-zone hostplants, suggesting higher host specificity  
463       in tropical insects.

464        Given our results here and elsewhere that metabarcoding can deliver reliable metrics of  
465        arthropod communities (Yu *et al.* 2012; Ji *et al.* 2013; Edwards *et al.* 2014; Yang *et al.* 2014),  
466        we suggest that metabarcoding can now be used to carry out the large numbers of surveys  
467        needed to test the four competing (and perhaps coexisting) explanations of Lewinsohn and  
468        Roslin (2008). Components A (more tropical plant species) and B (more tropical arthropod  
469        species per plant species) can be differentiated by parameterizing plant models along a  
470        tropical to temperate gradient. A is self-evidently true, but if B is important then we should  
471        observe a steeper slope of the plant model in the tropics. Following Dyer *et al.* (2007),  
472        components C (tropical insects having narrower host ranges) and D (more rapid spatial  
473        turnover in tropical insects) can be tested and differentiated by the relative contributions to  
474        beta diversity of changing hostplant species and spanning geographic distance, in tropical and  
475        temperate habitats. Although in many parts of the world, DNA-barcode databases are not yet  
476        sufficiently comprehensive to be able to identify most insects to species level, it should be  
477        possible to use a combination of sequence matching (Ratnasingham & Hebert 2007) and  
478        phylogenetic placement (Matsen *et al.* 2010; Berger *et al.* 2011) to identify most specimens to  
479        at least family level, allowing differentiation of herbivores from non-herbivores in the near  
480        future.

481 **Acknowledgments**

482 We are very grateful to the three reviewers and to the editor for comments and suggestions.  
483 We thank Mei Long for field assistance, Zhaoli Ding for sequencing, Philip Beckschäfer for  
484 providing Mengsong GIS layer, and Mengsong village, Bulong Nature Reserve and Hainan  
485 Yinggeling National Nature Reserve for field support. Funding for fieldwork in Mengsong  
486 was provided by GIZ/BMZ (Project Nos. 08.7860.3-001.00, 13.1432.7-001.00) on behalf of  
487 the Government of the Federal Republic of Germany. DWY was supported by Yunnan  
488 Province (20080A001), the Chinese Academy of Sciences (0902281081, KSCX2-YW-Z-  
489 1027), the National Natural Science Foundation of China (31170498), the Ministry of Science  
490 and Technology of China (2012FY110800), the University of East Anglia and its GRACE  
491 computing cluster, and the State Key Laboratory of Genetic Resources and Evolution at the  
492 Kunming Institute of Zoology.

493 **References**

- 494 Asner GP, Anderson CB, Martin RE *et al.* (2014) Landscape-scale changes in forest structure  
495 and functional traits along an Andes-to-Amazon elevation gradient. *Biogeosciences*, **11**,  
496 843–856.
- 497 Baldeck CA, Asner GP, Martin RE *et al.* (2015) Operational tree species mapping in a diverse  
498 tropical forest with airborne imaging spectroscopy. *Plos One*, **10**, e0118403.
- 499 Basset Y, Cizek L, Cuénoud P *et al.* (2012) Arthropod diversity in a tropical forest. *Science*,  
500 **338**, 1481–1484.
- 501 Beckschäfer P, Fehrmann L, Harrison RD, Xu J, Kleinn C (2014) Mapping Leaf Area Index  
502 in subtropical upland ecosystems using RapidEye imagery and the randomForest  
503 algorithm. *iForest*, **7**, 1–11.
- 504 Berger SA, Krompass D, Stamatakis A (2011) Performance, accuracy, and web server for  
505 evolutionary placement of short sequence reads under maximum likelihood. *Systematic*  
506 *Biology*, **60**, 291–302.
- 507 Bohmann K, Evans A, Gilbert MTP *et al.* (2014) Environmental DNA for wildlife biology  
508 and biodiversity monitoring. *Trends in Ecology & Evolution*, **29**, 358–367.
- 509 Bustamante MMC, Roitman I, Aide TM *et al.* (2015) Towards an integrated monitoring  
510 framework to assess the effects of tropical forest degradation and recovery on carbon  
511 stocks and biodiversity. *Global Change Biology*. doi: 451 10.1111/gcb.13087.
- 512 Caporaso JG, Bittinger K, Bushman FD *et al.* (2010a) PyNAST: A flexible tool for aligning  
513 sequences to a template alignment. *Bioinformatics*, **26**, 266–267.
- 514 Caporaso JG, Kuczynski J, Stombaugh J *et al.* (2010b) QIIME allows analysis of high-  
515 throughput community sequencing data. *Nature methods*, **7**, 335–6.
- 516 Cardoso P, Rigal F, Carvalho JC (2015) BAT - Biodiversity Assessment Tools, an R package  
517 for the measurement and estimation of alpha and beta taxon, phylogenetic and functional  
518 diversity. *Methods in Ecology and Evolution*, **6**, 232–236.
- 519 Castagneyrol B, Jactel H (2012) Unraveling plant-animal diversity relationships: A meta-  
520 regression analysis. *Ecology*, **93**, 2115–2124.
- 521 Clarke LJ, Soubrier J, Weyrich LS, Cooper A (2014) Environmental metabarcodes for insects:  
522 in silico PCR reveals potential for taxonomic bias. *Molecular Ecology Resources*, **14**,  
523 1160–1170.
- 524 Condon MA, Scheffer SJ, Lewis ML, Swensen SM (2008) Hidden neotropical diversity:  
525 greater than the sum of its parts. *Science*, **320**, 928–931.
- 526 Cristescu ME (2014) From barcoding single individuals to metabarcoding biological  
527 communities: towards an integrative approach to the study of global biodiversity. *Trends*  
528 *in Ecology & Evolution*, **29**, 566–571.
- 529 Cruaud A, Ronsted N, Chantarasuwan B *et al.* (2012) An Extreme case of plant-insect  
530 codiversification: Figs and fig-pollinating wasps. *Systematic Biology*, **61**, 1029–1047.
- 531 Deagle BE, Jarman SN, Coissac E, Taberlet P (2014) DNA metabarcoding and the  
532 cytochrome c oxidase subunit I marker: not a perfect match. *Biology Letters*, **10**,  
533 20140562.
- 534 Dengler J (2009) Which function describes the species-area relationship best? A review and  
535 empirical evaluation. *Journal of Biogeography*, **36**, 728–744.
- 536 Dyer LA, Singer MS, Lill JT *et al.* (2007) Host specificity of Lepidoptera in tropical and  
537 temperate forests. *Nature*, **448**, 696–699.

- 538 Edgar RC (2010) Search and clustering orders of magnitude faster than BLAST.  
539 *Bioinformatics*, **26**, 2460–2461.
- 540 Edgar PP, Heidelberg HM, Bekaert M *et al.* (2015) The butterfly plant arms-race escalated  
541 by gene and genome duplications. *Proceedings of the National Academy of Sciences of*  
542 *the United States of America*, **112**, 8362–8366.
- 543 Edwards DP, Magrach A, Woodcock P *et al.* (2014) Selective-logging and oil palm: multi-  
544 taxon impacts, biodiversity indicators, and trade-offs for conservation planning.  
545 *Ecological Applications*, **24**, 2029–2049.
- 546 Ficetola GF, Pansu J, Bonin A *et al.* (2015) Replication levels, false presences and the  
547 estimation of the presence/absence from eDNA metabarcoding data. *Molecular Ecology*  
548 *Resources*, **15**, 543–556.
- 549 Gioria M, Bacaro G, Feehan J (2011) Evaluating and interpreting cross-taxon congruence:  
550 Potential pitfalls and solutions. *Acta Oecologica*, **37**, 187–194.
- 551 Haddad NM, Crutsinger GM, Gross K *et al.* (2009) Plant species loss decreases arthropod  
552 diversity and shifts trophic structure. *Ecology Letters*, **12**, 1029–1039.
- 553 Hamilton AJ, Novotný V, Waters EK *et al.* (2013) Estimating global arthropod species  
554 richness: refining probabilistic models using probability bounds analysis. *Oecologia*, **171**,  
555 357–65.
- 556 Hao X, Jiang R, Chen T (2011) Clustering 16S rRNA for OTU prediction: A method of  
557 unsupervised Bayesian clustering. *Bioinformatics*, **27**, 611–618.
- 558 Holt BG (2013) An update of Wallace’s zoogeographic regions of the world. *Science*, **339**,  
559 74–78.
- 560 Hortal J, Borges P a V, Gaspar C (2006) Evaluating the performance of species richness  
561 estimators: Sensitivity to sample grain size. *Journal of Animal Ecology*, **75**, 274–287.
- 562 Hyams D (2009) CurveExpert: A curve fitting system for Windows. URL  
563 <http://www.curveexpert.net> (accessed 15 Feb 2016).
- 564 Ji Y, Ashton L, Pedley SM *et al.* (2013) Reliable, verifiable and efficient monitoring of  
565 biodiversity via metabarcoding. *Ecology Letters*, **16**, 1245–1257.
- 566 Lau MW-N, Fellows JR, Chan BPL (2010) Carnivores (Mammalia: Carnivora) in South  
567 China: a status review with notes on the commercial trade. *Mammal Review*, **40**, 247–  
568 292.
- 569 Lenz TL, Becker S (2008) Simple approach to reduce PCR artefact formation leads to reliable  
570 genotyping of MHC and other highly polymorphic loci--implications for evolutionary  
571 analysis. *Gene*, **427**, 117–123.
- 572 Lewinsohn TM, Roslin T (2008) Four ways towards tropical herbivore megadiversity.  
573 *Ecology Letters*, **11**, 398–416.
- 574 Lin J, Ng S-C, Zhang M *et al.* (2013) Vegetation of Yinggeling Nature Reserve. In:  
575 *Biodiversity and conservation of Hainan Yinggeling Nature Reserve* (eds Jiang H, Chan  
576 BPL, Zhou Y, *et al.*), pp. 214–259. China Forestry Press, Beijing, China.
- 577 Lopez LCS, De Aguiar Fracasso MP, Mesquita DO, Palma ART, Riul P (2012) The  
578 relationship between percentage of singletons and sampling effort: A new approach to  
579 reduce the bias of richness estimates. *Ecological Indicators*, **14**, 164–169.
- 580 Matsen FA, Kodner RB, Armbrust EV (2010) pplacer: linear time maximum-likelihood and  
581 Bayesian phylogenetic placement of sequences onto a fixed reference tree. *BMC*  
582 *Bioinformatics*, **11**, 538.
- 583 Munch K, Boomsma W, Huelsenbeck JP, Willerslev E, Nielsen R (2008) Statistical  
584 assignment of DNA sequences using Bayesian phylogenetics. *Systematic biology*, **57**,  
585 750–7.



- 586 Novotny V, Basset Y (2005) Host specificity of insect herbivores in tropical forests.  
587 *Proceedings of the Royal Society. B*, **272**, 1083–1090.
- 588 Novotny V, Basset Y, Miller SE *et al.* (2002) Low host specificity of herbivorous insects in a  
589 tropical forest. *Nature*, **416**, 841–844.
- 590 Novotny V, Drozd P, Miller SE *et al.* (2006) Why are there so many species of herbivorous  
591 insects in tropical rainforests? *Science*, **313**, 1115–8.
- 592 Novotny V, Miller SE, Hulcr J *et al.* (2007) Low beta diversity of herbivorous insects in  
593 tropical forests. *Nature*, **448**, 692–697.
- 594 Oksanen J, Blanchet FG, Kindt R *et al.* (2015) vegan: Community Ecology Package. URL  
595 <http://CRAN.R-project.org/package=vegan>.
- 596 Paudel E, Dossa GGO, Xu J, Harrison RD (2015) Litterfall and nutrient return along a  
597 disturbance gradient in a tropical montane forest. *Forest Ecology and Management*, **353**,  
598 97–106.
- 599 Pellissier L, Ndiribe C, Dubuis A *et al.* (2013) Turnover of plant lineages shapes herbivore  
600 phylogenetic beta diversity along ecological gradients. *Ecology Letters*, **16**, 600–608.
- 601 Piñol J, Mir G, Gomez-Polo P, Agustí N (2015) Universal and blocking primer mismatches  
602 limit the use of high-throughput DNA sequencing for the quantitative metabarcoding of  
603 arthropods. *Molecular Ecology Resources*, **15**, 819–830.
- 604 R Core Team (2015) R: a language and environment for statistical computing. URL  
605 <https://www.R-project.org/>.
- 606 Ranwez V, Harispe S, Delsuc F, Douzery EJP (2011) MACSE: Multiple Alignment of  
607 Coding SEquences accounting for frameshifts and stop codons. *PLoS ONE*, **6**, e22594.
- 608 Ratnasingham S, Hebert PDN (2007) BOLD: The Barcode of Life Data System ([http://www.](http://www.barcodinglife.org)  
609 [barcodinglife.org](http://www.barcodinglife.org)). *Molecular Ecology Notes*, **7**, 355–364.
- 610 Ratnasingham S, Hebert PDN (2013) A DNA-based registry for all animal species: The  
611 Barcode Index Number (BIN) system. *PLoS One*, **8**, e66213.
- 612 Riedel A, Sagata K, Suhardjono YR, Tänzler R, Balke M (2013) Integrative taxonomy on the  
613 fast track - towards more sustainability in biodiversity research. *Frontiers in Zoology*, **10**,  
614 15.
- 615 Schmidt S, Schmid-Egger C, Morinière J, Haszprunar G, Hebert PDN (2015) DNA barcoding  
616 largely supports 250 years of classical taxonomy: identifications for Central European  
617 bees (Hymenoptera, Apoidea partim). *Molecular Ecology Resources*, **15**, 985–1000.
- 618 Sreekar R, Zhang K, Xu J, Harrison RD (2015) Yet another empty forest: Consider the  
619 conservation value of a recently established tropical nature reserve. *PLoS One*, **10**,  
620 e0117920.
- 621 Stork NE, McBroom J, Gely C, Hamilton AJ (2015) New approaches narrow global species  
622 estimates for beetles, insects, and terrestrial arthropods. *Proceedings of the National*  
623 *Academy of Sciences*, **112**, 7519–7523.
- 624 Taberlet P, Coissac E, Pompanon F, Brochmann C, Willerslev E (2012) Towards next-  
625 generation biodiversity assessment using DNA metabarcoding. *Molecular Ecology*, **21**,  
626 2045–2050.
- 627 Tang CQ, Humphreys AM, Fontaneto D, Barraclough TG (2014) Effects of phylogenetic  
628 reconstruction method on the robustness of species delimitation using single-locus data.  
629 *Methods in Ecology and Evolution*, **5**, 1086–1094.
- 630 Thompson JN (1994). The coevolutionary process. University of Chicago Press, Chicago,  
631 USA.

- 632 Walther BA, Moore JL (2005) The concepts of bias, precision and accuracy, and their use in  
633 testing the performance of species richness estimators, with a literature review of  
634 estimator performance. *Ecography*, **28**, 815–829.
- 635 Xu J, Lebel L, Sturgeon J (2009) Functional links between biodiversity, livelihoods, and  
636 culture in a Hani swidden landscape in southwest China. *Ecology and Society*, **14**, 20.
- 637 Yang C, Wang X, Miller J a. *et al.* (2014) Using metabarcoding to ask if easily collected soil  
638 and leaf-litter samples can be used as a general biodiversity indicator. *Ecological*  
639 *Indicators*, **46**, 379–389.
- 640 Yu DW, Ji Y, Emerson BC *et al.* (2012) Biodiversity soup: metabarcoding of arthropods for  
641 rapid biodiversity assessment and biomonitoring. *Methods in Ecology and Evolution*, **3**,  
642 613–623.
- 643 Zhu H, Shi JP, Zhao CJ (2005) Species composition, physiognomy and plant diversity of the  
644 tropical montane evergreen broad-leaved forest in Southern Yunnan. *Biodiversity and*  
645 *Conservation*, **14**, 2855–2870.

646 **Data Accessibility**

647 DNA sequences: Genbank's Short Read Archive (Accession numbers: SRP065001 and

648 SRP065147) and Dryad doi: <http://dx.doi.org/10.5061/dryad.37b53>.

649 Bioinformatic script: Dryad doi: <http://dx.doi.org/10.5061/dryad.37b53>.

650 All input data sets to R and R script: Dryad doi: <http://dx.doi.org/10.5061/dryad.37b53>.

654 **Author Contributions**

655 KZ, DWY, RDH, and HJ designed the study. KZ, RDH, SL, CXY, CYY and HW collected  
656 data, led by RDH and SL. KZ, YJ, CXY, XW performed the molecular experiments. KZ and  
657 YJ performed the bioinformatic analyses. KZ performed the statistical analyses and wrote the  
658 first draft of the manuscript. DWY and RDH contributed substantially to revisions.

659 **Table 1** Procrustes correlations among plant, Insecta, and individual insect order communities in (a) Yinggeling and (b) Mengsong (9999  
 660 permutations), with the input NMDS (non-metric multidimensional scaling) ordinations calculated from binary Jaccard dissimilarities (k = 2  
 661 axes used in Yinggeling, k = 4 in Mengsong). Correlations with plants are bolded. In Mengsong, where insects were sampled in two seasons, wet  
 662 vs. dry-season Procrustes correlations are presented on the diagonal and are underlined, and the proportions of wet-season Operational  
 663 Taxonomic Units (OTUs) that were also collected in the dry season are reported below as percentages.

664  
665 (a) Yinggeling

|                               | Coleoptera | Diptera | Hemiptera | Hymenoptera | Lepidoptera | <b>Trees (<i>n</i> = 297)</b> |
|-------------------------------|------------|---------|-----------|-------------|-------------|-------------------------------|
| Insecta ( <i>n</i> = 1995)    |            |         |           |             |             | <b>0.76***</b>                |
| Coleoptera ( <i>n</i> = 239)  |            | 0.54**  | 0.47*     | 0.63***     | 0.43*       | <b>0.44*</b>                  |
| Diptera ( <i>n</i> = 848)     |            |         | 0.64***   | 0.57**      | 0.53**      | <b>0.73***</b>                |
| Hemiptera ( <i>n</i> = 205)   |            |         |           | 0.45*       | 0.39        | <b>0.60**</b>                 |
| Hymenoptera ( <i>n</i> = 163) |            |         |           |             | 0.55**      | <b>0.56*</b>                  |
| Lepidoptera ( <i>n</i> = 263) |            |         |           |             |             | <b>0.65***</b>                |

666

667 (b) Mengsong

|             |                        | Insecta         | Coleoptera    | Diptera         | Hemiptera       | Hymenoptera     | Lepidoptera | Psocoptera  | Vascular plants<br>( <i>n</i> = 807) |
|-------------|------------------------|-----------------|---------------|-----------------|-----------------|-----------------|-------------|-------------|--------------------------------------|
| Insecta     | wet ( <i>n</i> = 2073) | <u>0.75</u> *** |               |                 |                 |                 |             |             | <b>0.78</b> ***                      |
|             | dry ( <i>n</i> = 2215) | 60.6%           |               |                 |                 |                 |             |             | <b>0.75</b> ***                      |
| Coleoptera  | wet ( <i>n</i> = 375)  |                 | <u>0.45</u> * | 0.60***         | 0.58***         | 0.55***         | 0.43*       | 0.52**      | <b>0.53</b> ***                      |
|             | dry ( <i>n</i> = 603)  |                 | 38.0%         | 0.75***         | 0.70***         | 0.63***         | 0.51***     | 0.60***     | <b>0.63</b> ***                      |
| Diptera     | wet ( <i>n</i> = 414)  |                 |               | <u>0.52</u> *** | 0.67***         | 0.71***         | 0.63***     | 0.52***     | <b>0.71</b> ***                      |
|             | dry ( <i>n</i> = 413)  |                 |               | 70.9%           | 0.78***         | 0.61***         | 0.52***     | 0.50**      | <b>0.65</b> ***                      |
| Hemiptera   | wet ( <i>n</i> = 435)  |                 |               |                 | <u>0.67</u> *** | 0.58***         | 0.44*       | 0.50**      | <b>0.70</b> ***                      |
|             | dry ( <i>n</i> = 370)  |                 |               |                 | 71.1%           | 0.61***         | 0.44*       | 0.57***     | <b>0.77</b> ***                      |
| Hymenoptera | wet ( <i>n</i> = 409)  |                 |               |                 |                 | <u>0.68</u> *** | 0.50**      | 0.57***     | <b>0.64</b> ***                      |
|             | dry ( <i>n</i> = 360)  |                 |               |                 |                 | 70.0%           | 0.51***     | 0.61***     | <b>0.72</b> ***                      |
| Lepidoptera | wet ( <i>n</i> = 78)   |                 |               |                 |                 |                 | <u>0.33</u> | 0.40        | <b>0.46</b> **                       |
|             | dry ( <i>n</i> = 95)   |                 |               |                 |                 |                 | 61.1%       | 0.47**      | <b>0.38</b>                          |
| Psocoptera  | wet ( <i>n</i> = 71)   |                 |               |                 |                 |                 |             | <u>0.42</u> | <b>0.55</b> ***                      |
|             | dry ( <i>n</i> = 63)   |                 |               |                 |                 |                 |             | 85.7%       | <b>0.52</b> ***                      |

668 \*  $p < 0.05$ , \*\*  $p < 0.01$ , \*\*\*  $p < 0.001$ , non-significant values shown in gray, after adjustment for multiple tests ( $p.adjust$ , method = "fdr")

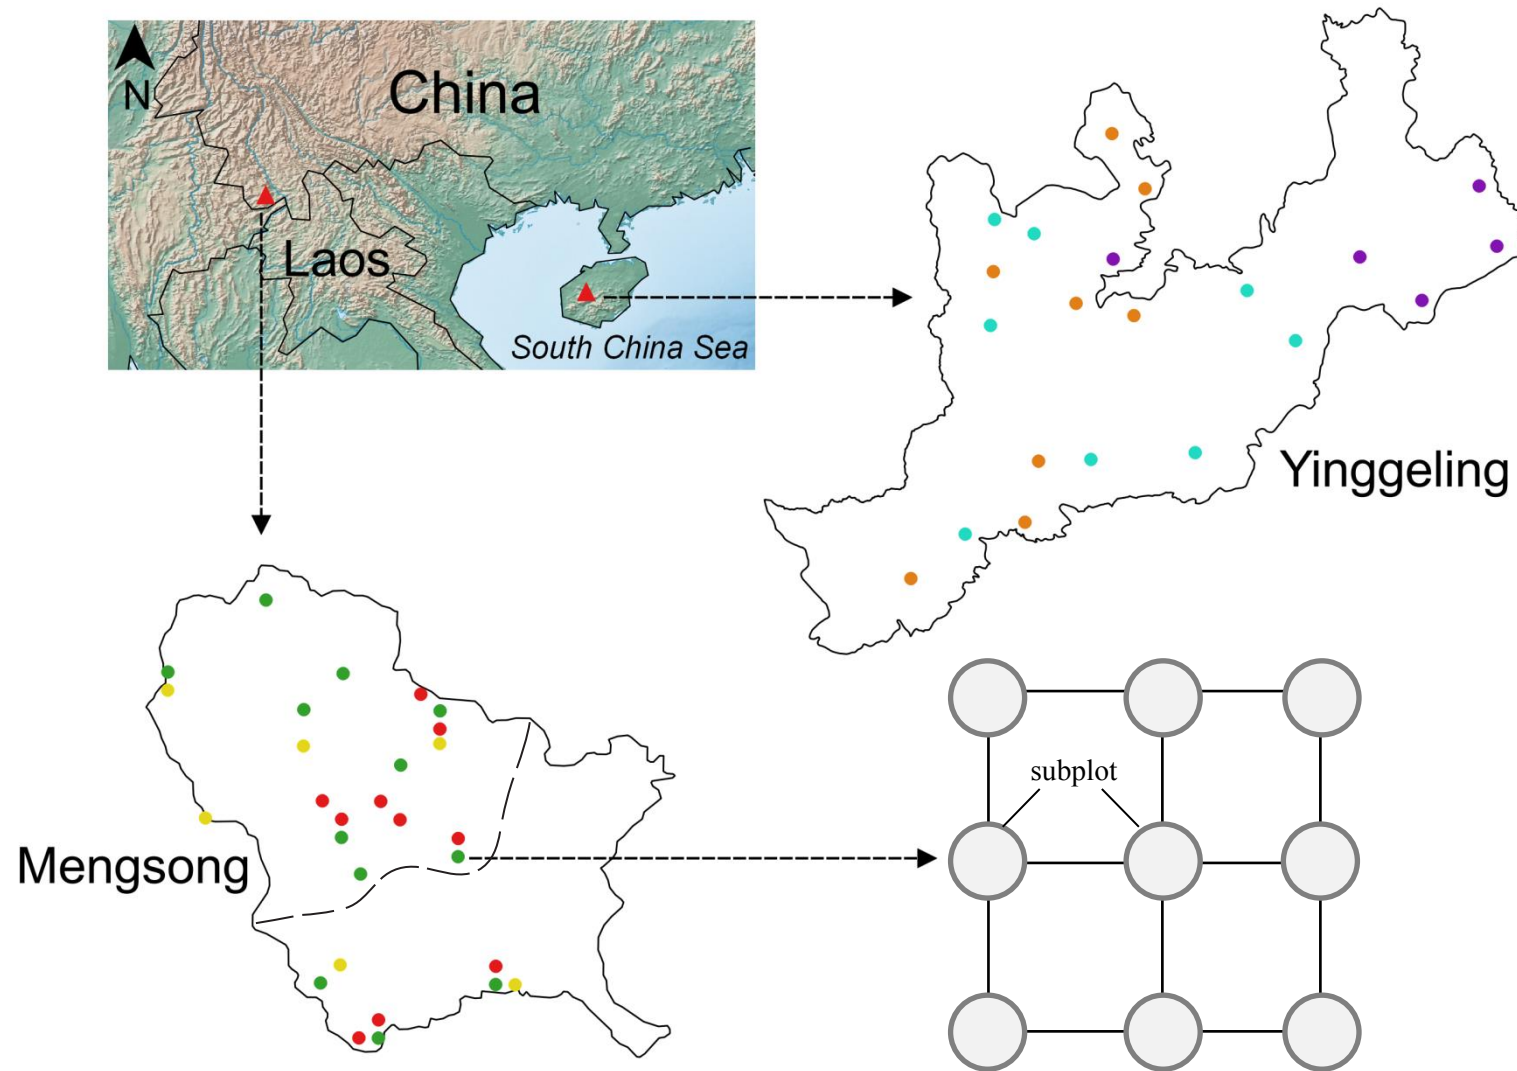

**Figure 1** Inventory plots in Yinggeling ( $n = 21$ ) and Mengsong ( $n = 28$ ). Colors stand for different elevation categories (orange =  $< 600\text{ m}$ ; blue =  $600\text{--}800\text{ m}$ ; purple =  $\geq 800\text{ m}$ ) in Yinggeling, and for different habitat types (red = mature forest; green = regenerating forest; yellow = open land) in Mengsong. The Mengsong area left of the dashed line is included in Bulong Nature Reserve.

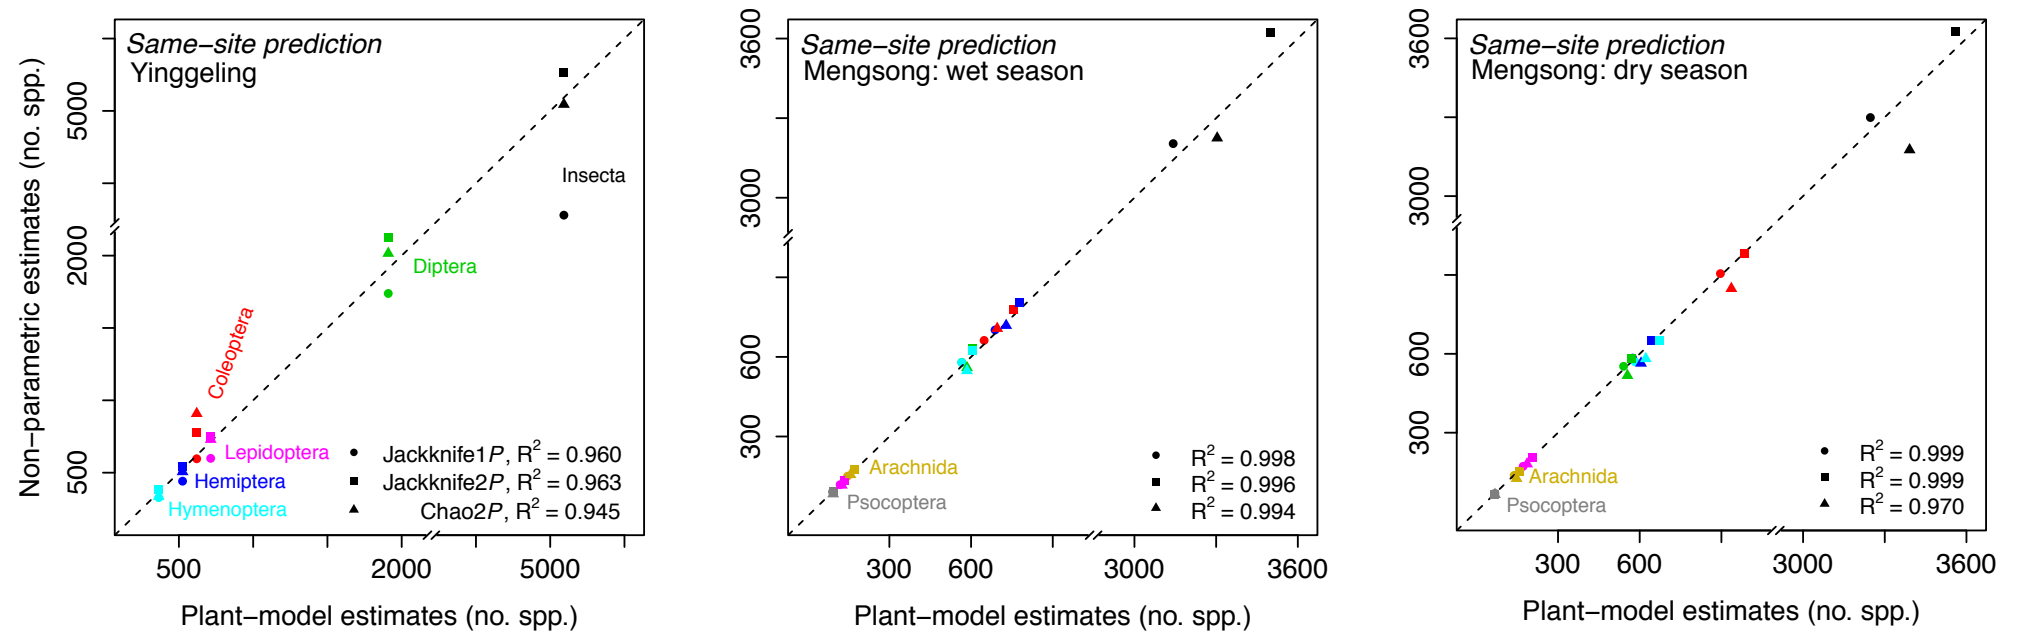

**Figure 2** Same-site predictions. Scatterplot of plant-model estimates versus non-parametric estimates of total OTU (Operational Taxonomic Unit) richness, for Arachnida (for Mengsong only), Insecta and insect orders that contained  $\geq 50$  OTUs. To quantify the goodness-of-fit of these two estimates, explained variances ( $R^2$ ) for insect orders were calculated from a  $y = x$  model (dashed line). Circles, squares and triangles stand for P-corrected versions of the Jackknife1, Jackknife2 and Chao estimators, respectively. Different colors stand for different taxa; only taxa absent from Yinggeling are labeled in the Mengsong figures. The plant-model functions were Weibull for all taxa in Yinggeling and Mengsong, except for Hymenoptera (dry season) in Mengsong, which was a power function. Note breaks in the axes.



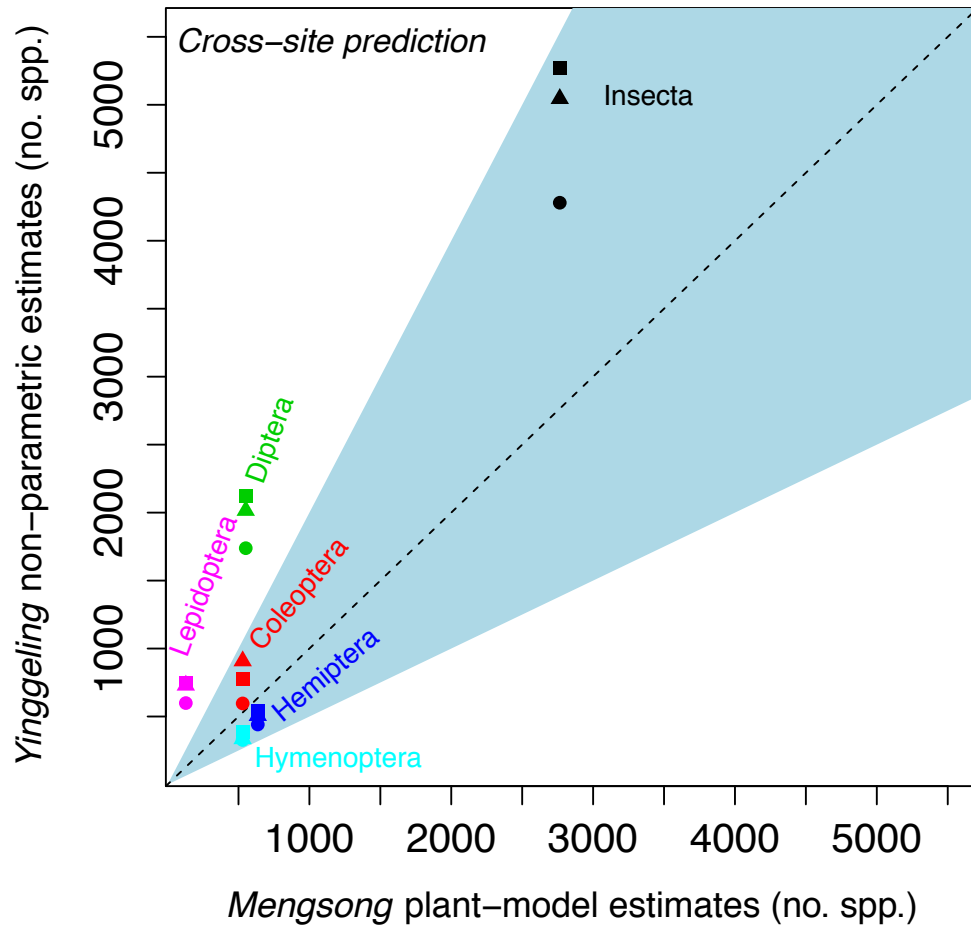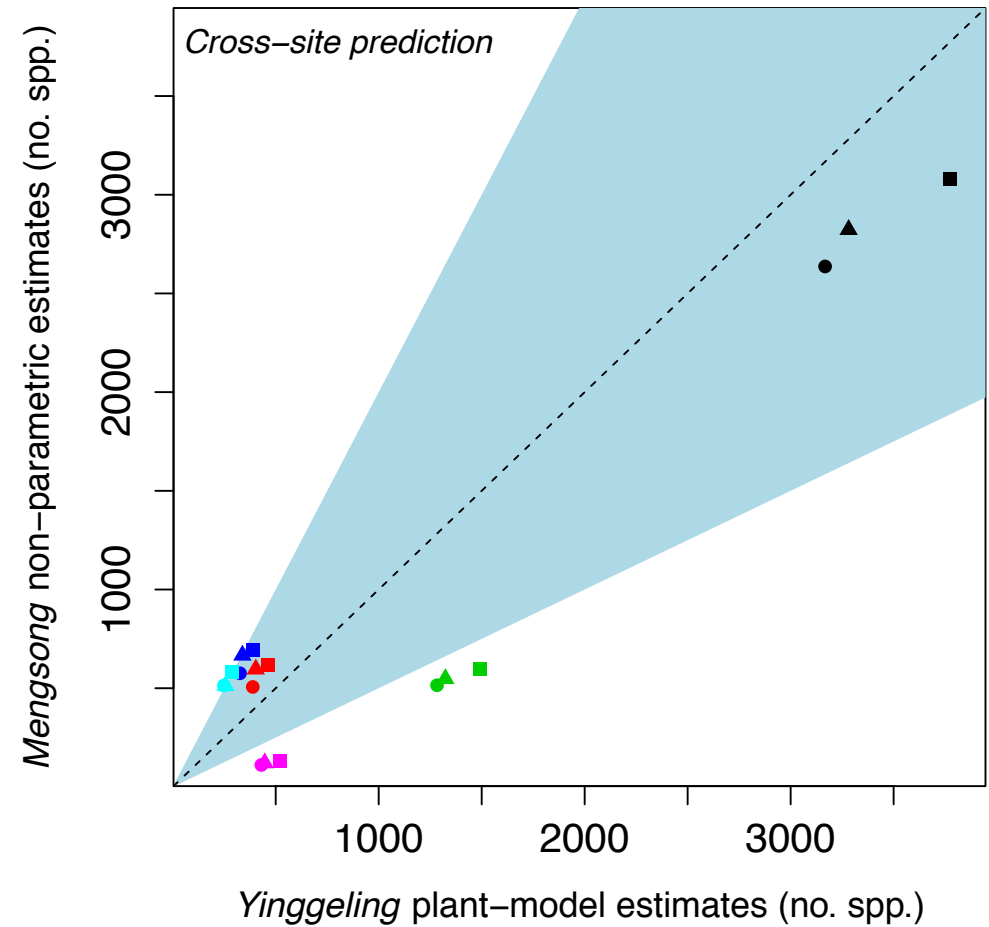

**Figure 3** Cross-site predictions. Scatterplot of plant-model estimates versus non-parametric estimates of total OTU richness. Symbols as in Figure 2. Plant models from one landscape were used to predict non-parametric estimates in the other landscape. Shown here are the Mengsong wet-season results. Mengsong dry-season results are similar and shown in Figure S5. The shaded area encompasses a two-fold difference between the two estimates ( $y = 0.5x$  to  $y = 2x$ ). The plant-model functions were Weibull for all taxa in Yinggeling and Mengsong, except for Lepidoptera in Mengsong, which was a linear function.

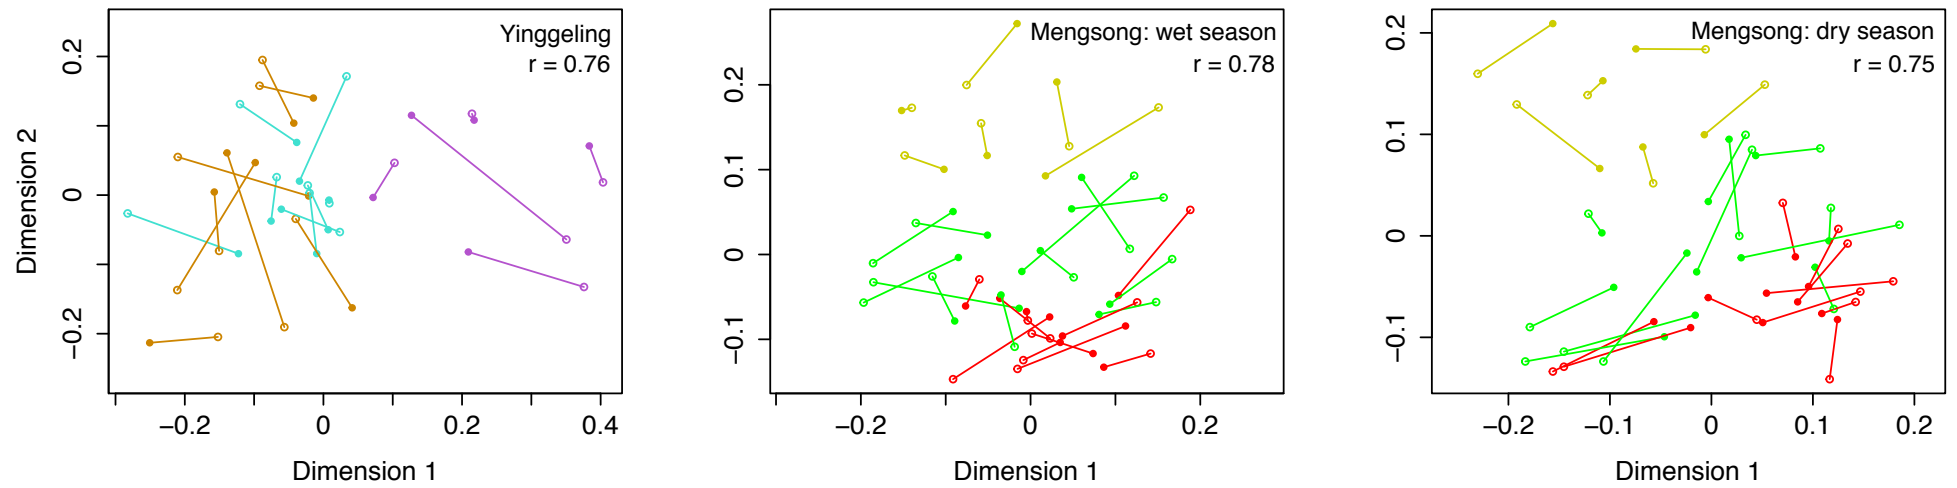

**Figure 4** Procrustes superimposition plots between plant and Insecta communities (9999 permutations), with the input of non-metric multidimensional scaling (NMDS) ordinations calculated from binary Jaccard dissimilarities ( $k = 2$  axes used in Yinggeling,  $k = 4$  in Mengsong). All Procrustes correlation coefficients ( $r$ ) are significantly different from zero at  $p < 0.001$  (Table 1). Each point is a census site; solid points indicate plant data, and hollow points insect data. Colors as in Figure 1.

# Plant diversity accurately predicts insect diversity in two tropical landscapes: Supporting Information

Kai Zhang, \* †<sup>1</sup> Siliang Lin, ‡<sup>1</sup> Yinqiu Ji, \* Chenxue Yang, \* Xiaoyang Wang, \* † Chunyan Yang, \* Hesheng Wang, § Haisheng Jiang, ‡ Rhett D. Harrison ¶ \*\* and Douglas W. Yu \* ††

\* State Key Laboratory of Genetic Resources and Evolution, Kunming Institute of Zoology, Chinese Academy of Sciences, Kunming, Yunnan 650223, China

† Kunming College of Life Science, University of the Chinese Academy of Sciences, Kunming 650204, China

‡ School of Life Sciences, South China Normal University, Guangzhou, Guangdong 510631, China

§ Hainan Yinggeling National Nature Reserve, Baisha, Hainan 572800, China

¶ World Agroforestry Center, East and Central Asia Regional Office, Kunming 650201, China

\*\* Center for Mountain Ecosystem Studies (CMES), Kunming Institute of Botany, Chinese Academy of Sciences, Kunming 650201, China

†† School of Biological Sciences, University of East Anglia, Norwich Research Park, Norwich, Norfolk NR47TJ, UK

co-corresponding authors. DWY +86 871 68125438 (ofc), 86 871 65110887 (fax), [dougwyu@gmail.com](mailto:dougwyu@gmail.com); RDH +86 18687136498 (ofc), 86 871 65223377 (fax), [r.harrison@cgiar.org](mailto:r.harrison@cgiar.org)

<sup>1</sup> Shared first-authorship.

This PDF file includes:

Figs. S1 to S7

Table S1

NOTE: R Markdown output document (*Plants accurately predict insects\_R Markdown output.html*) is not include here and presented independently.

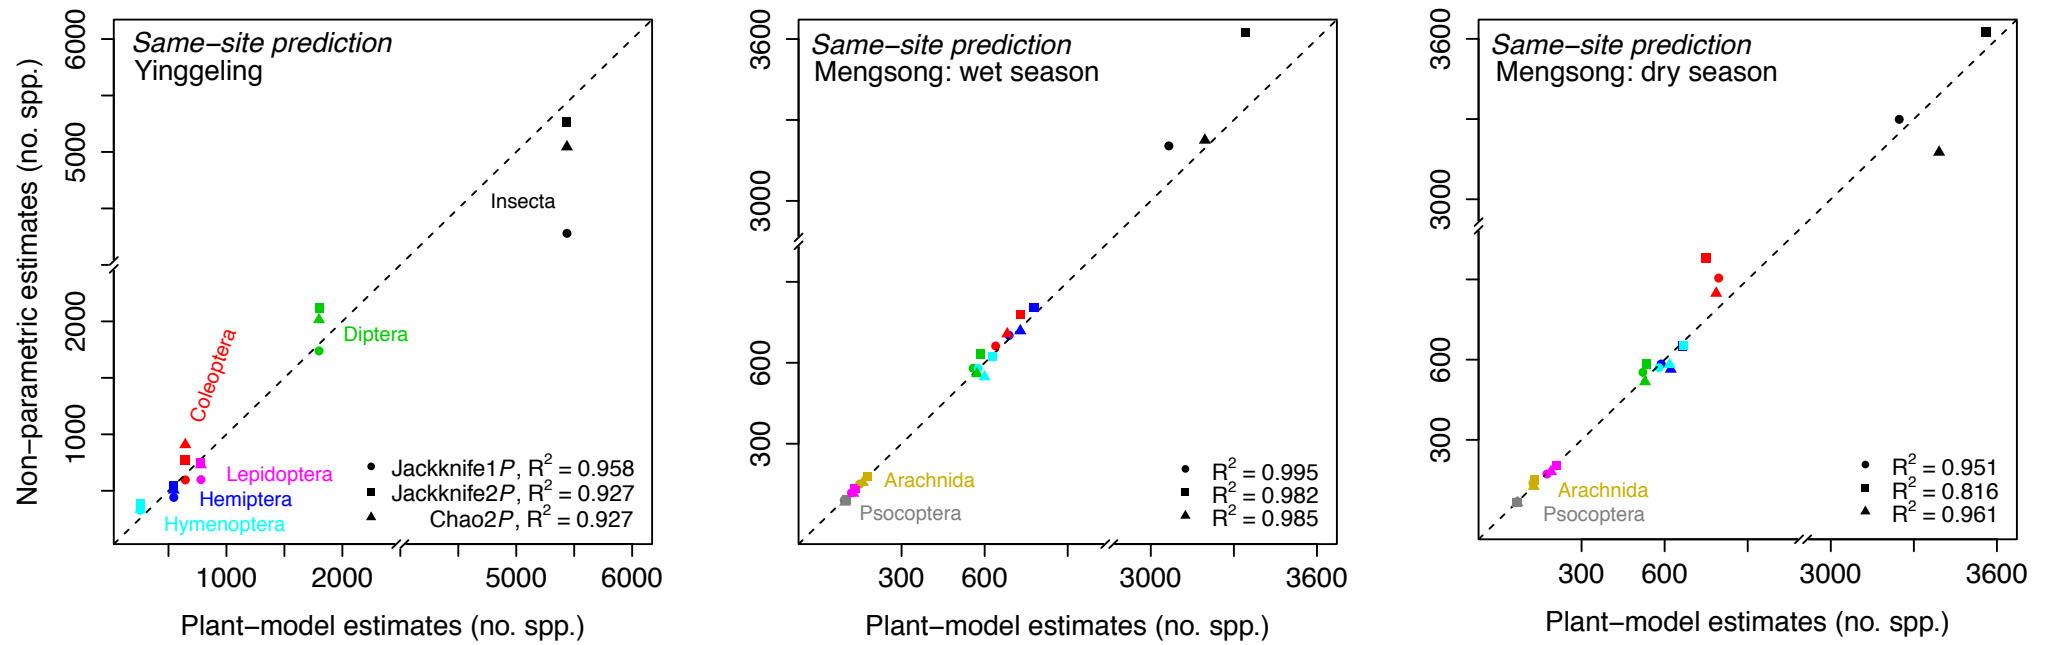

Figure S1 Same-site prediction. Scatterplot of plant-model (25 candidate functions) estimates versus non-parametric estimates of total OTU richness. Symbols as in Figure 2. Note breaks in the axes.

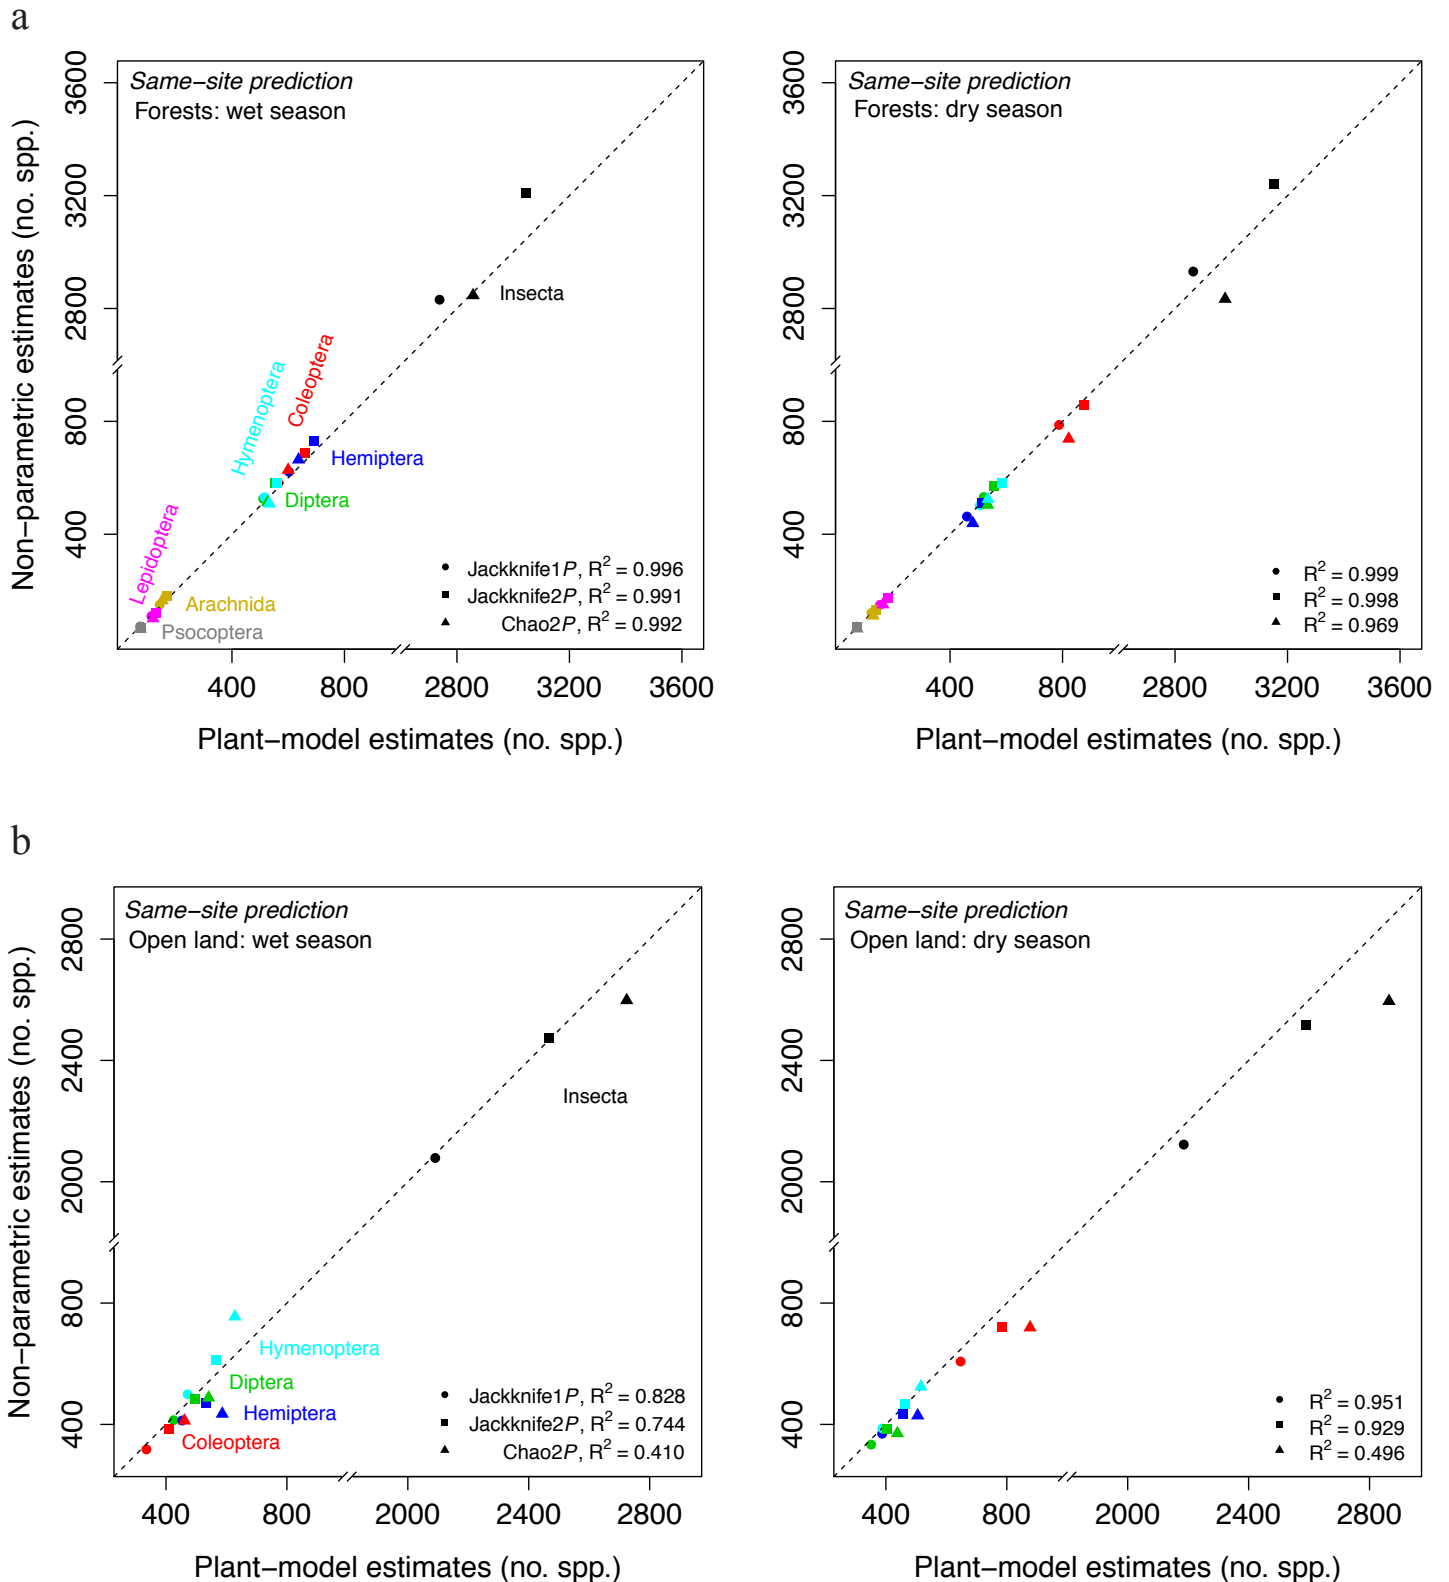

Figure S2 Same-site predictions. Scatterplot of plant-model estimates versus non-parametric estimates of total OTU richness in the (a) forests and (b) open land in Mengersong. Symbols as in Figure 2. The plant-model functions for (a) forests were Weibull for all taxa except Hymenoptera (dry season), which was a power function. The plant-model functions for (b) open land were power for all taxa except Coleoptera (wet season), which was a linear function. Note breaks in the axes.

a

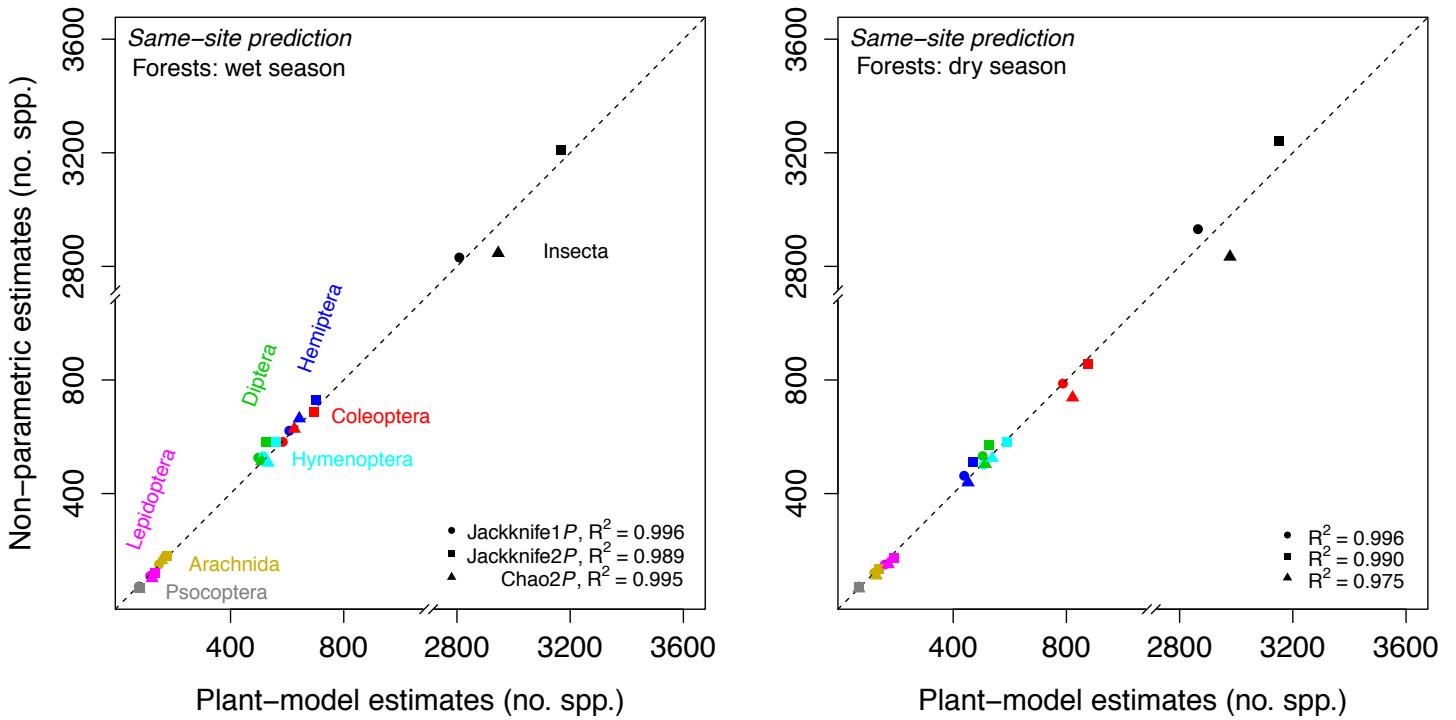

b

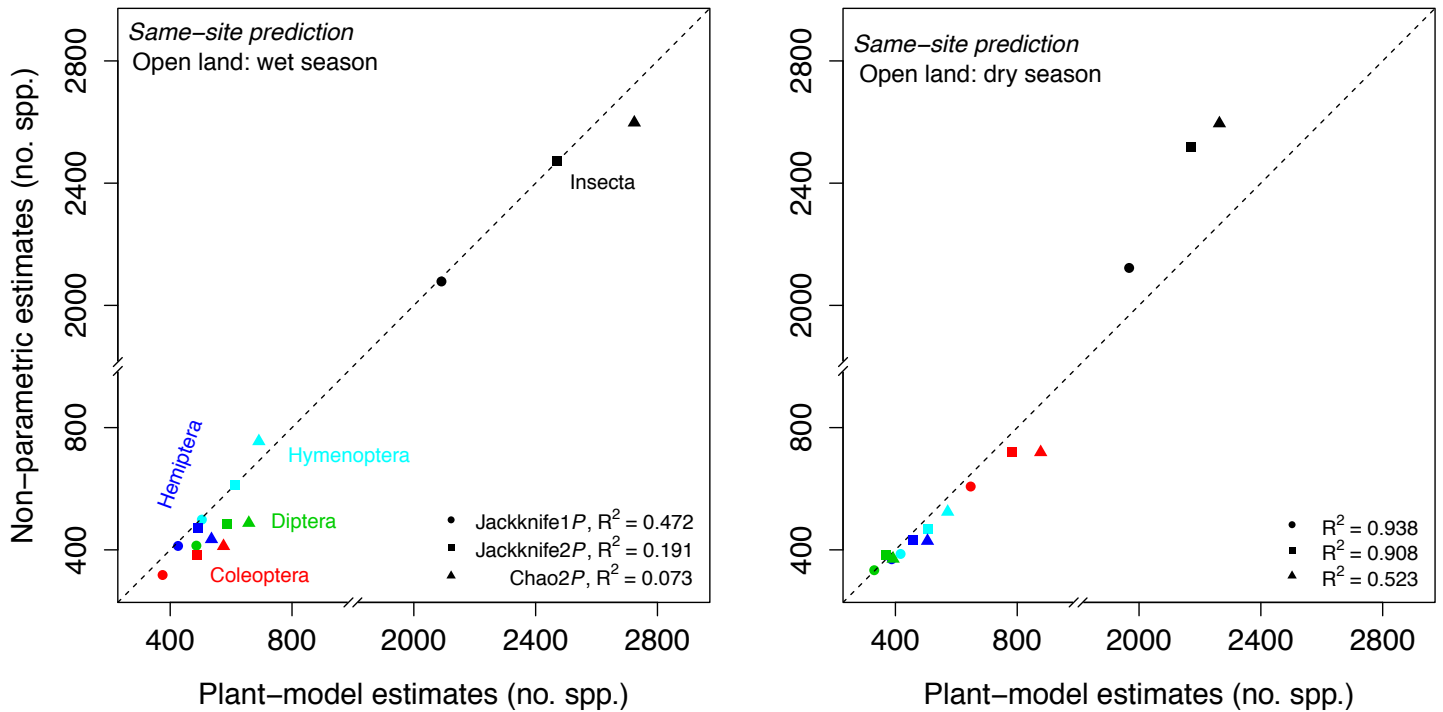

Figure S3 Same-site predictions. Scatterplot of plant-model (25 candidate functions) estimates versus non-parametric estimates of total OTU richness in the (a) forests and (b) open land in Mengersong. Symbols as in Figure 2. Note breaks in the axes.

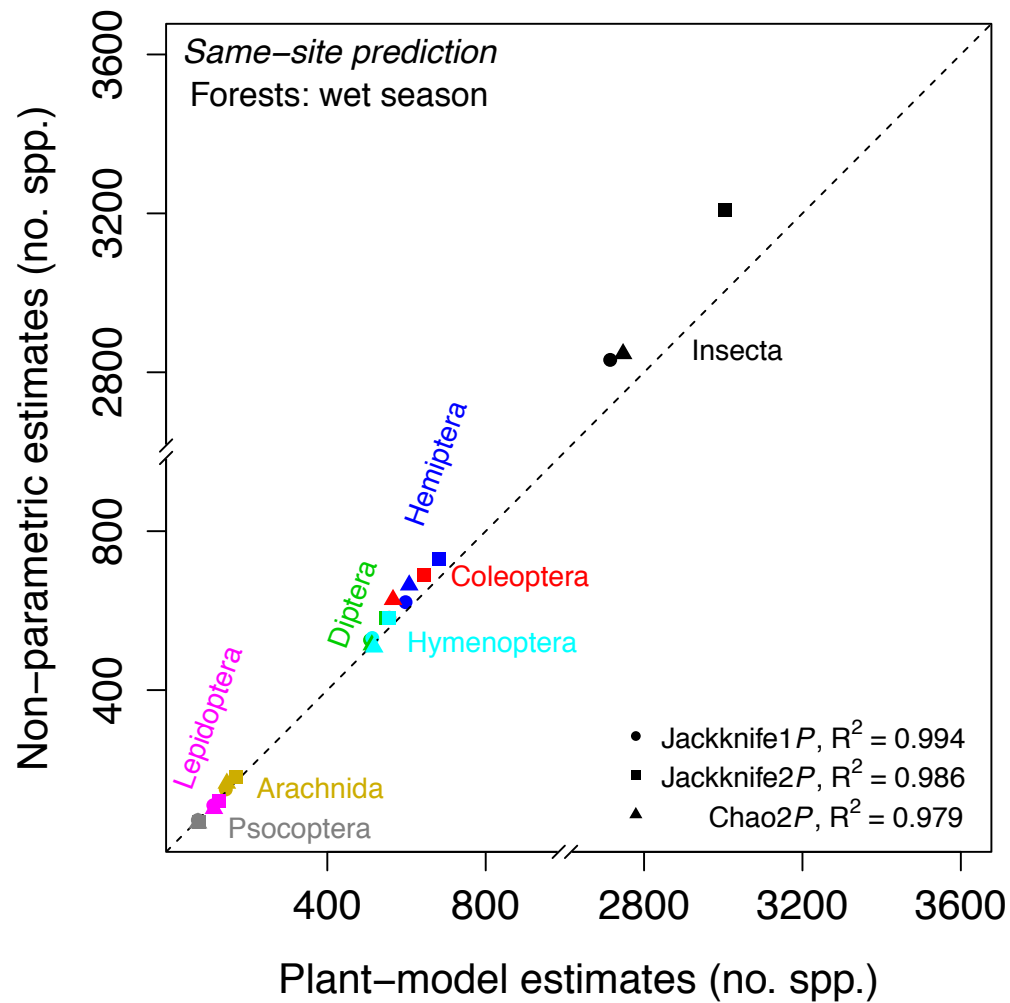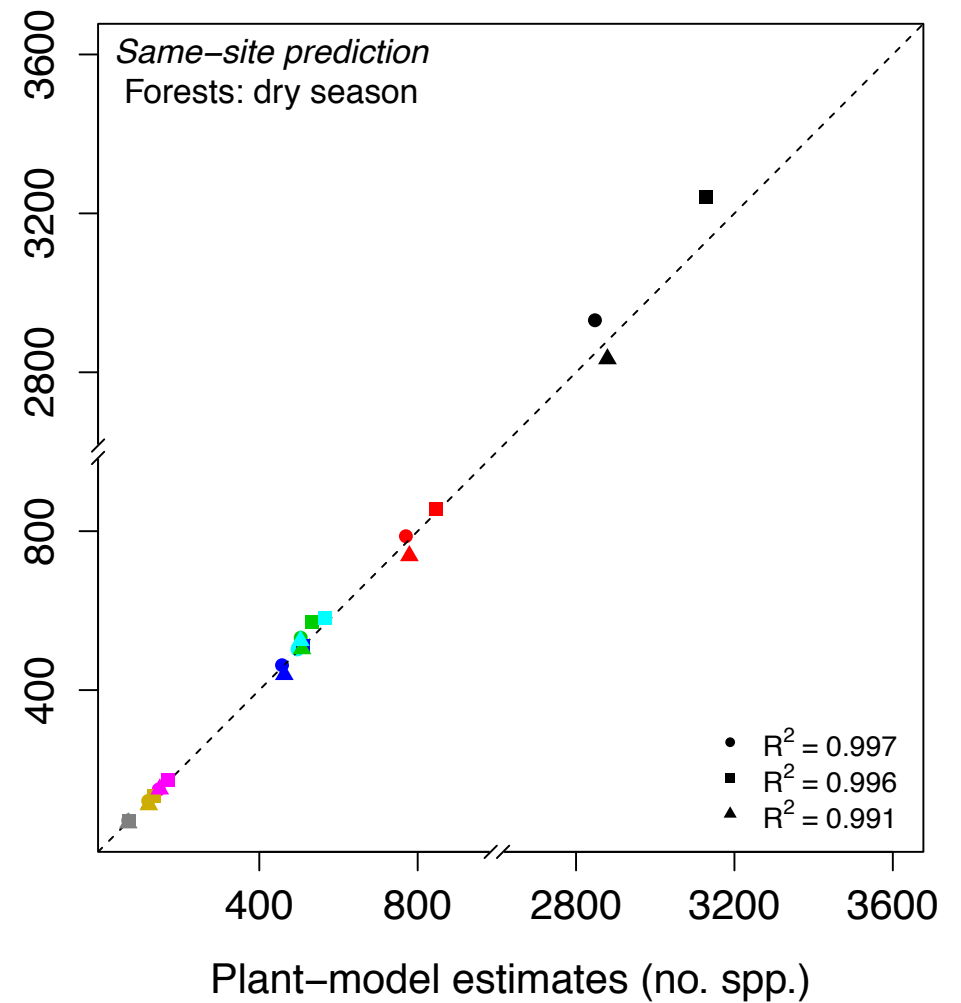

Figure S4 Same-site predictions. Scatterplot of plant-model estimates versus non-parametric estimates of total OTU richness in the forests in Mengsong. Only tree data were included to build the plant model. Symbols as in Figure 2. The plant-model functions were Weibull for all taxa except Hymenoptera (dry season), which was a linear function. Note breaks in the axes.

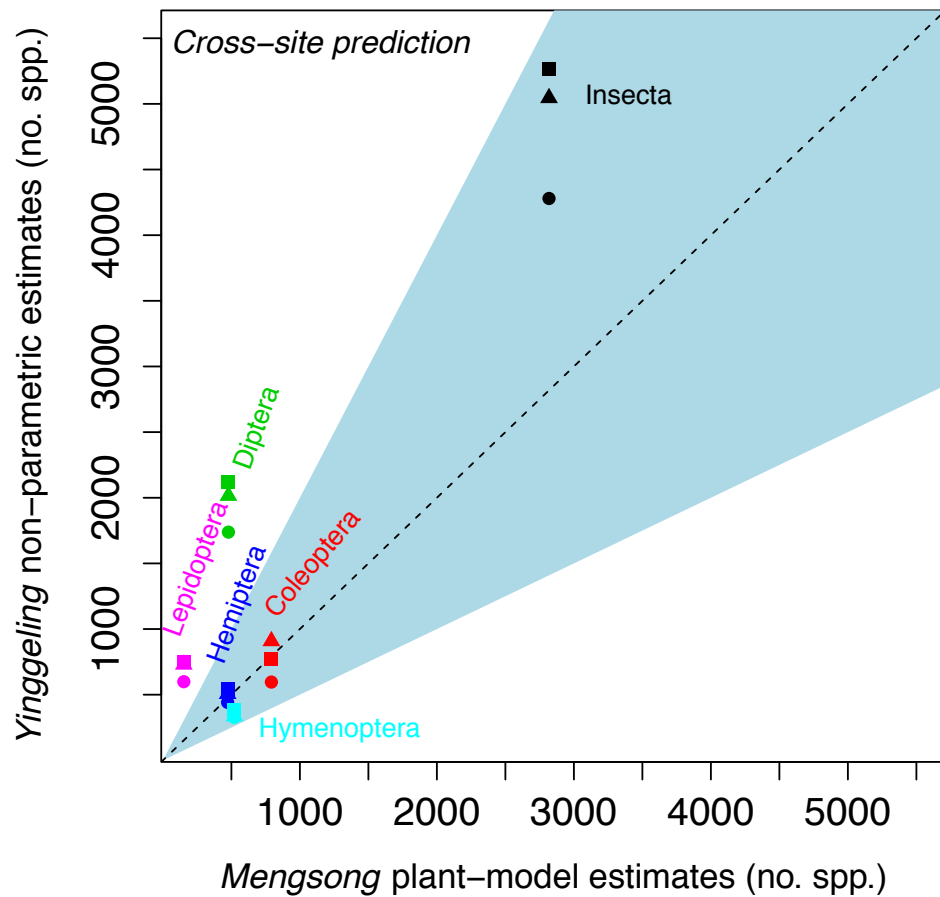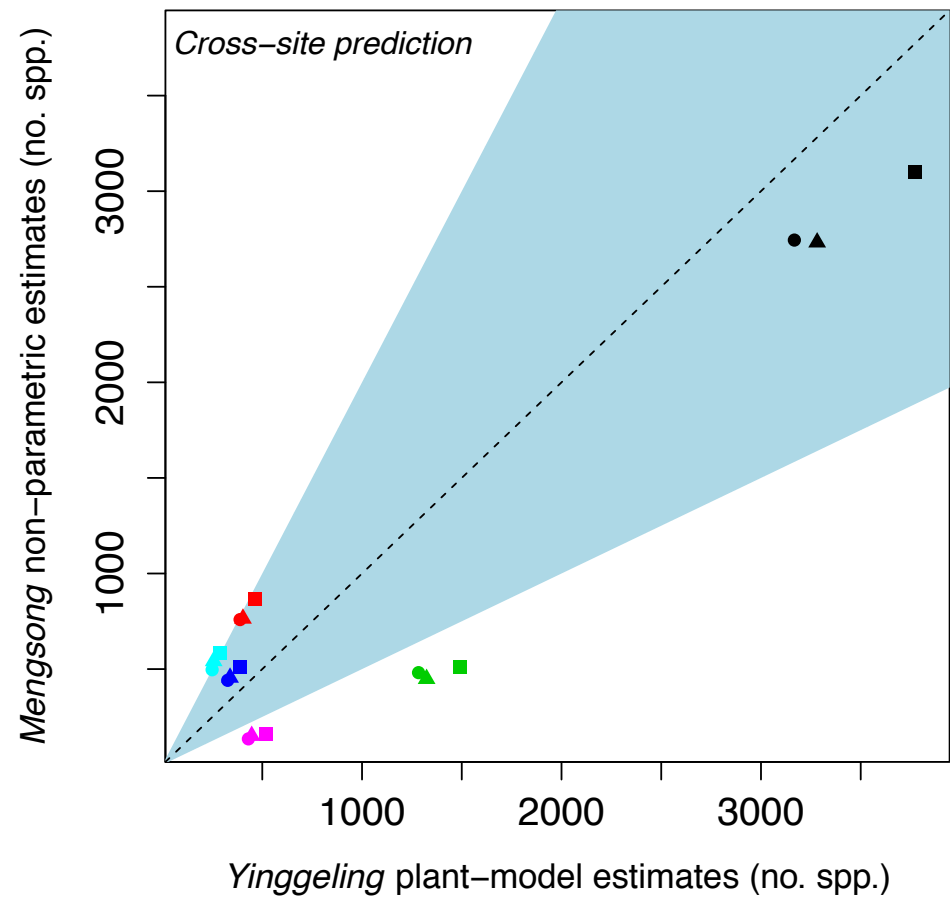

Figure S5 Cross-site predictions. Scatterplot of plant-model estimates versus non-parametric estimates of total OTU richness. Symbols as in Figure 3. Shown here are the Mengsong dry-season results. The plant-model functions were Weibull for all taxa in both Yinggeling and Mengsong.



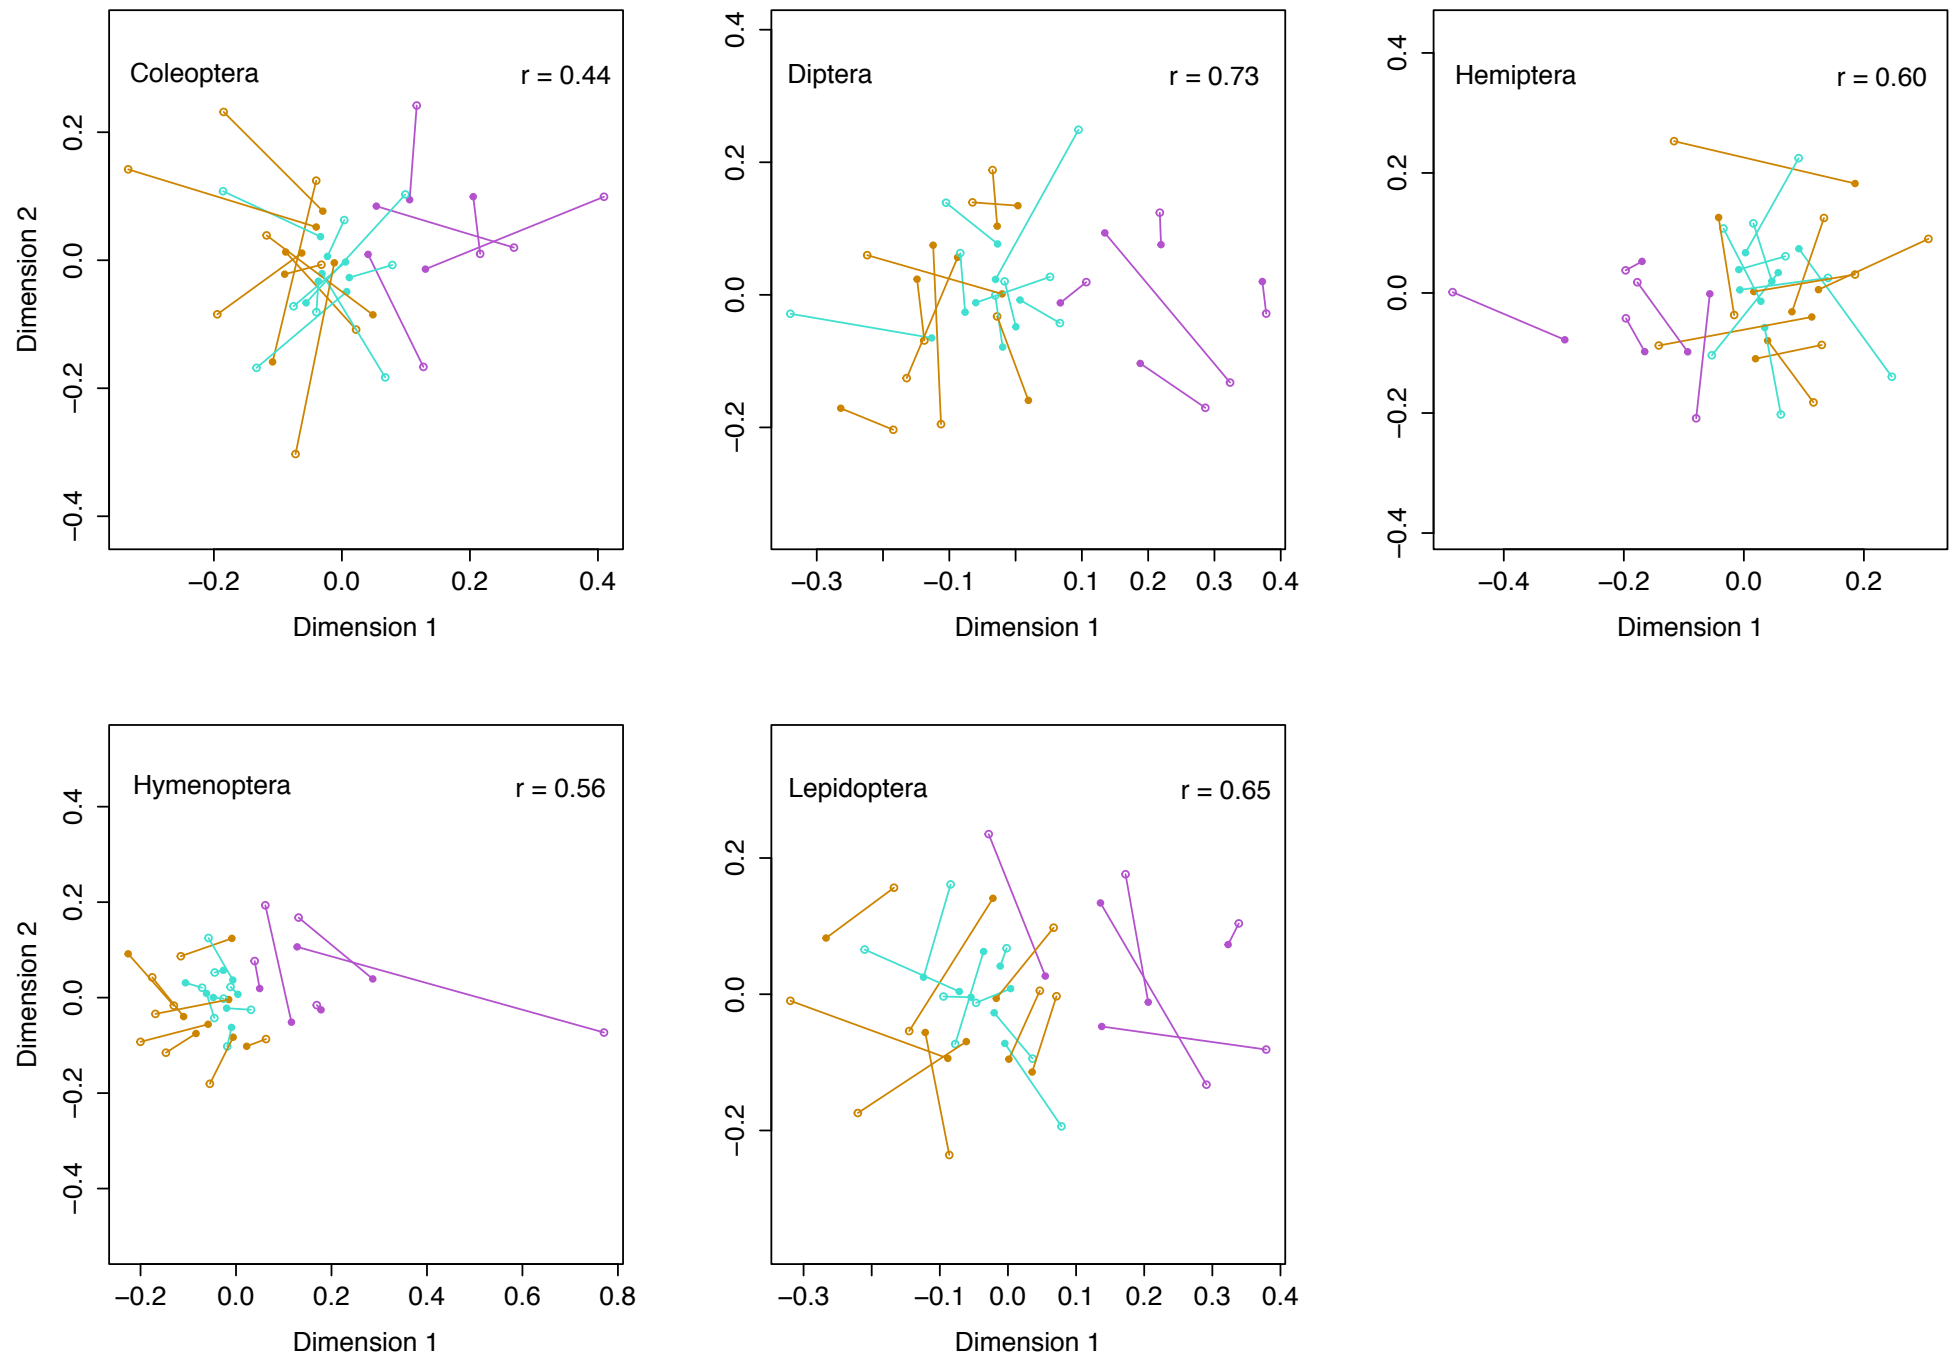

Figure S6 Procrustes superimposition plots between plant and insect order communities in Yinggeling. All Procrustes correlation coefficients ( $r$ ) are significantly different from zero at  $p < 0.05$  (Table 1). Symbols as in Figure 4.

**a**

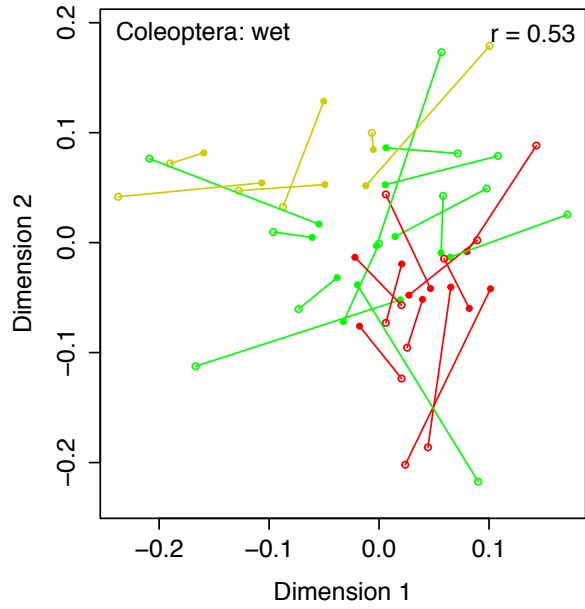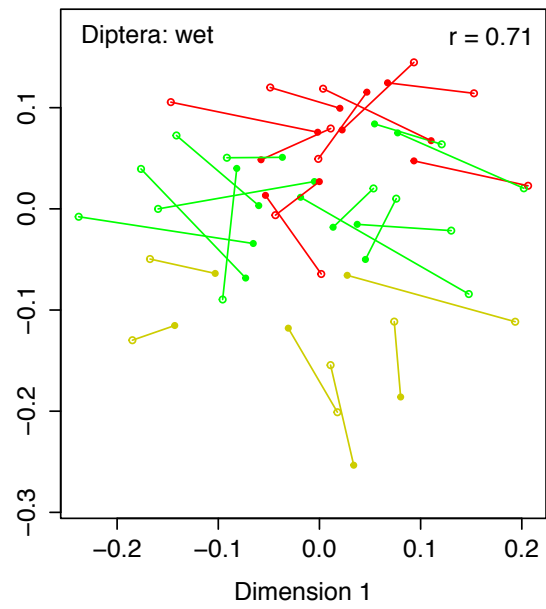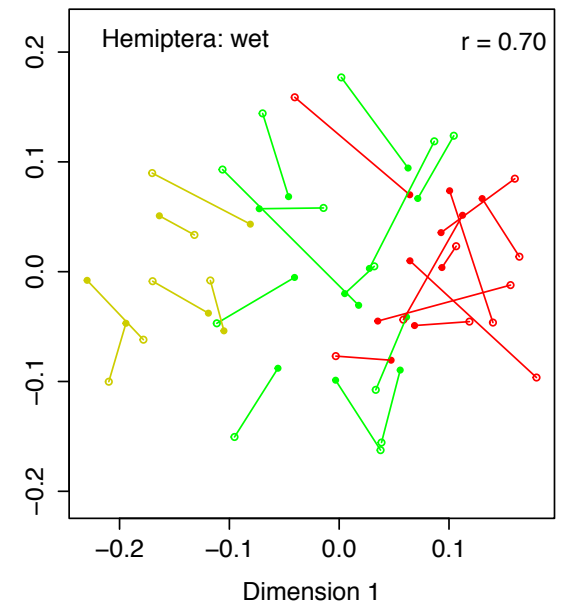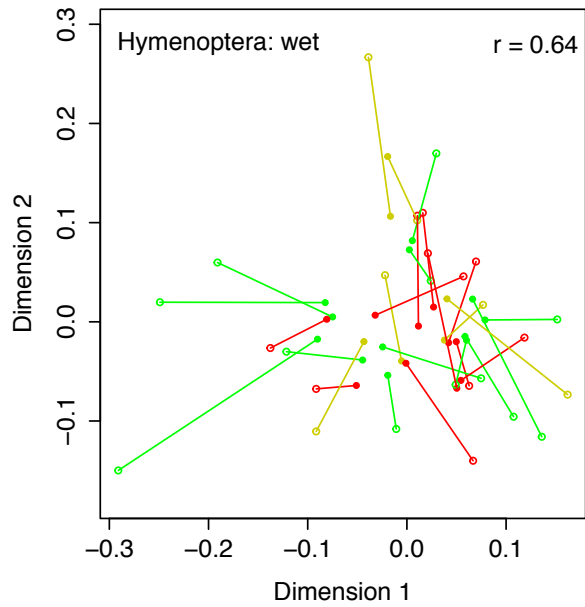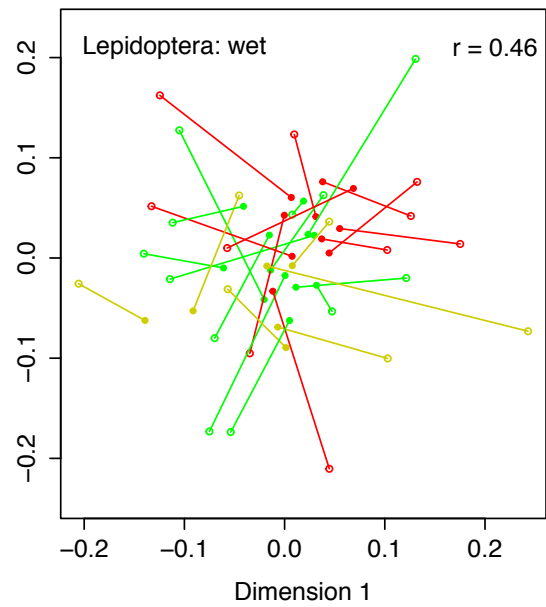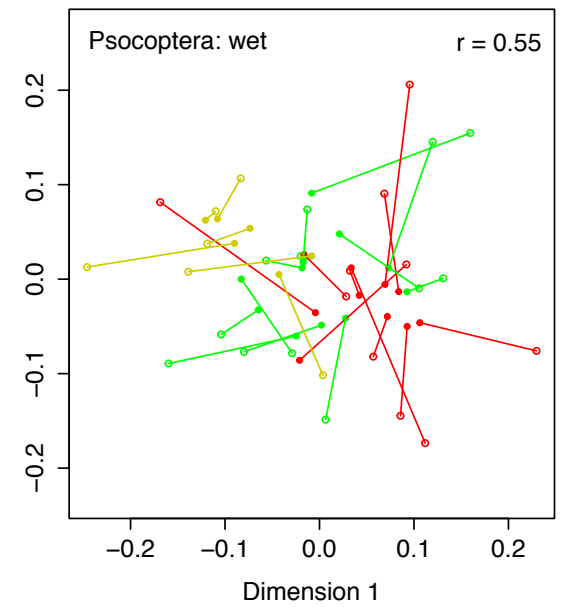

**b**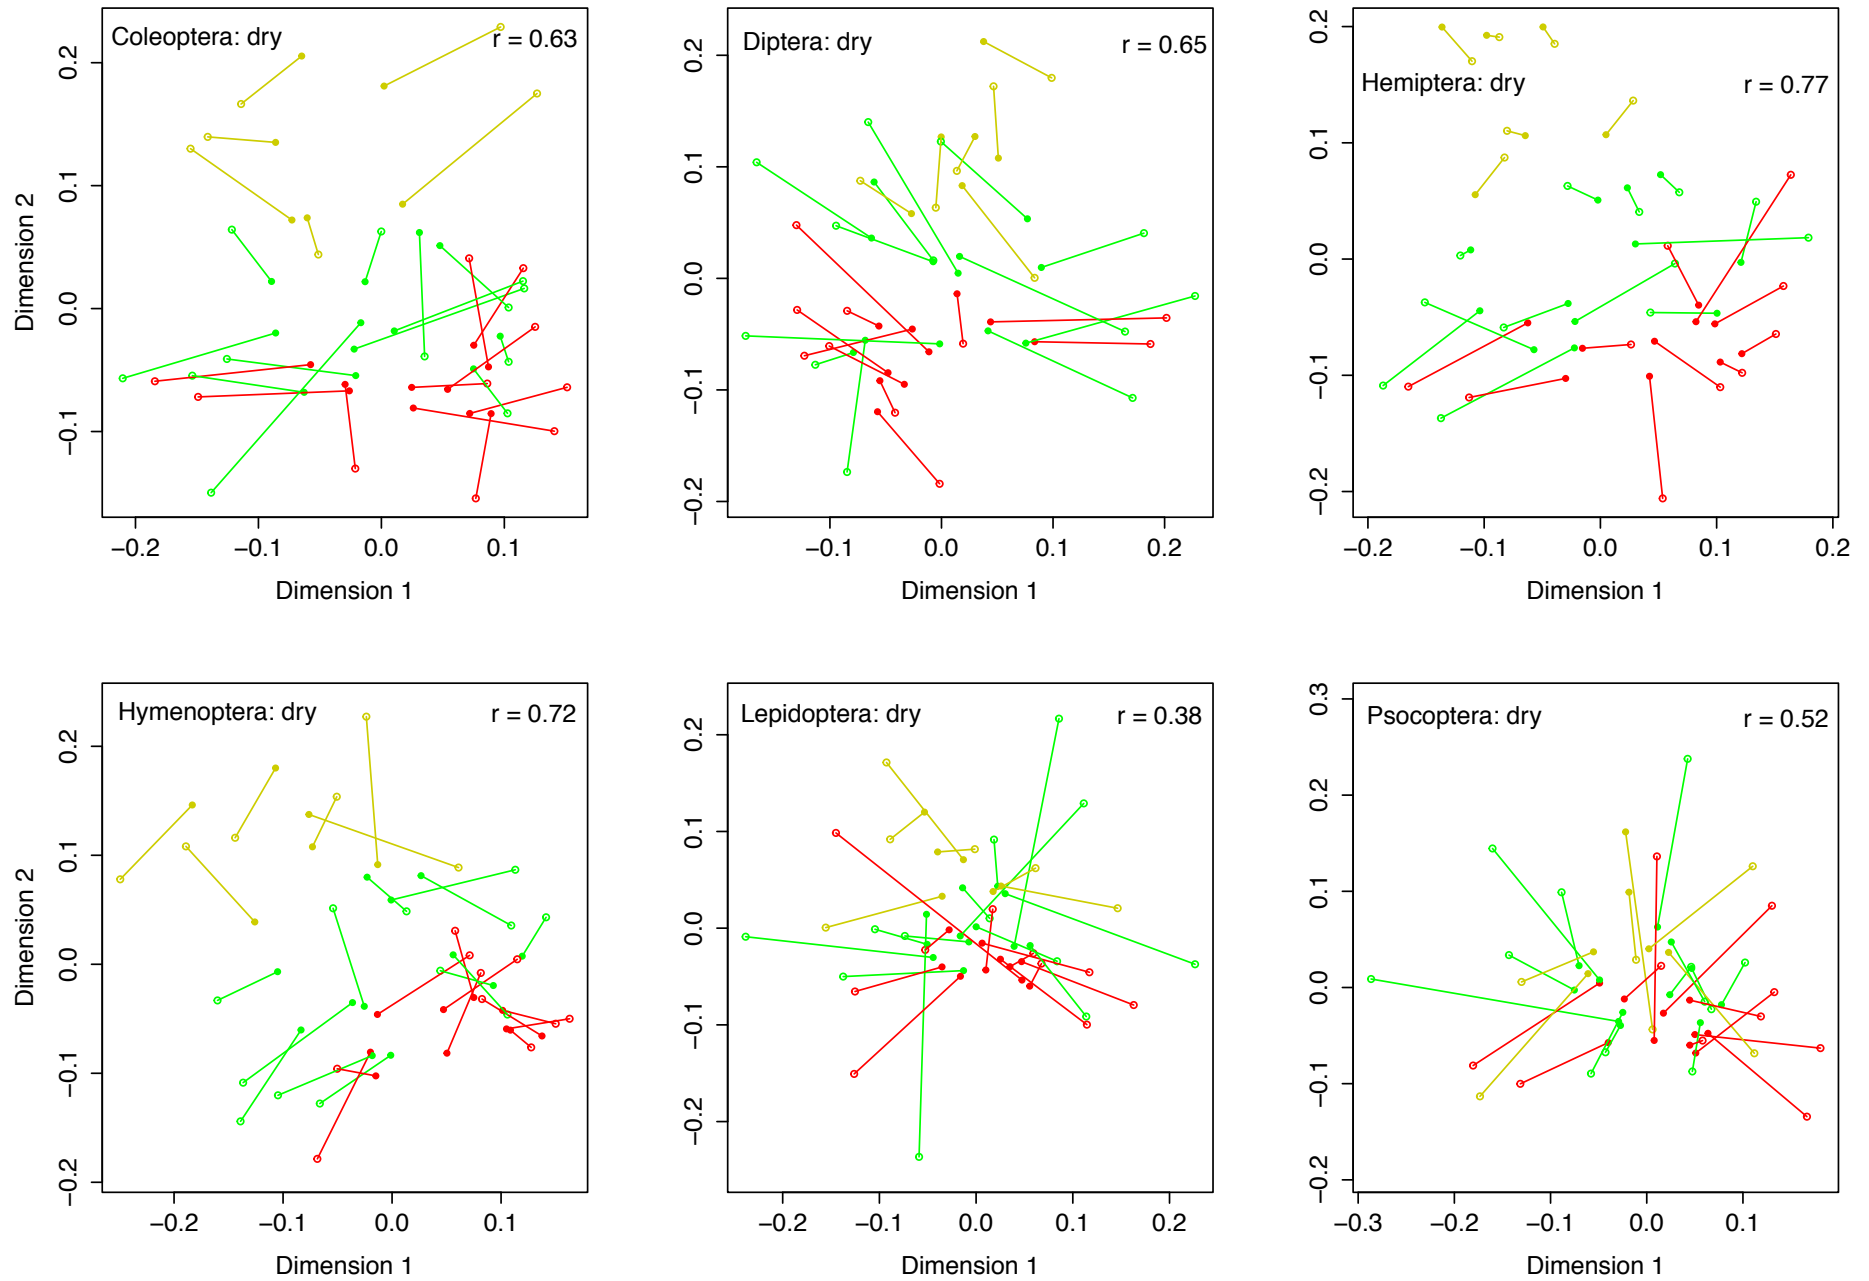

Figure S7 Procrustes superimposition plots between plant and insect order communities in (a) wet and (b) dry seasons of Mengsong. All Procrustes correlation coefficients ( $r$ ) are significantly different from zero at  $p < 0.01$  for wet season and at  $p < 0.001$  for dry season except for Lepidoptera (Table 1). Symbols as in Figure 4.

**Table S1** Procrustes correlations among plant, Insecta, and insect order communities in the forests of Mengsong ( $n = 22$ ) (9999 permutations), with the input of non-metric multidimensional scaling (NMDS) ordinations calculated from binary Jaccard dissimilarities ( $k = 4$ ). The percentage calculations, and the bold and underlined statistics as in Table 1.

|             |                    | Insecta        | Coleoptera    | Diptera      | Hemiptera    | Hymenoptera    | Lepidoptera | Psocoptera  | Vascular plants<br>( $n = 747$ ) |
|-------------|--------------------|----------------|---------------|--------------|--------------|----------------|-------------|-------------|----------------------------------|
| Insecta     | wet ( $n = 1780$ ) | <u>0.68***</u> |               |              |              |                |             |             | <b>0.69***</b>                   |
|             | dry ( $n = 1913$ ) | 55.9%          |               |              |              |                |             |             | <b>0.70***</b>                   |
| Coleoptera  | wet ( $n = 323$ )  |                | <u>0.55**</u> | 0.63***      | 0.59***      | 0.60***        | 0.47        | 0.50*       | <b>0.52**</b>                    |
|             | dry ( $n = 510$ )  |                | 34.9%         | 0.76***      | 0.72***      | 0.71***        | 0.56***     | 0.67***     | <b>0.68***</b>                   |
| Diptera     | wet ( $n = 363$ )  |                |               | <u>0.50*</u> | 0.65***      | 0.65***        | 0.58***     | 0.60***     | <b>0.62***</b>                   |
|             | dry ( $n = 381$ )  |                |               | 64.8%        | 0.71***      | 0.68***        | 0.53**      | 0.62***     | <b>0.65***</b>                   |
| Hemiptera   | wet ( $n = 360$ )  |                |               |              | <u>0.53*</u> | 0.58***        | 0.48*       | 0.52**      | <b>0.60***</b>                   |
|             | dry ( $n = 293$ )  |                |               |              | 65.5%        | 0.54**         | 0.53**      | 0.65***     | <b>0.73***</b>                   |
| Hymenoptera | wet ( $n = 360$ )  |                |               |              |              | <u>0.64***</u> | 0.52**      | 0.65***     | <b>0.58***</b>                   |
|             | dry ( $n = 308$ )  |                |               |              |              | 66.9%          | 0.52**      | 0.60***     | <b>0.66***</b>                   |
| Lepidoptera | wet ( $n = 70$ )   |                |               |              |              |                | <u>0.46</u> | 0.45        | <b>0.48*</b>                     |
|             | dry ( $n = 84$ )   |                |               |              |              |                | 56.0%       | 0.50*       | <b>0.36</b>                      |
| Psocoptera  | wet ( $n = 60$ )   |                |               |              |              |                |             | <u>0.44</u> | <b>0.52**</b>                    |
|             | dry ( $n = 59$ )   |                |               |              |              |                |             | 78.0%       | <b>0.62***</b>                   |

\*  $p < 0.05$ , \*\*  $p < 0.01$ , \*\*\*  $p < 0.001$ , non-significant values shown in gray, after adjustment for multiple tests ( $p.adjust$ , method = "fdr")
